## **Title: The locus coeruleus is a complex and differentiated neuromodulatory system**

**Authors:** Nelson K. Totah<sup>1\*</sup>, Ricardo M. Neves<sup>1</sup>, Stefano Panzeri<sup>2</sup>, Nikos K. Logothetis<sup>1,3</sup>, Oxana Eschenko<sup>1\*</sup>

### **Affiliations:**

<sup>1</sup>Dept. of Physiology of Cognitive Processes, Max Planck Institute for Biological Cybernetics, Spemannstrasse 38, 72076, Tuebingen, Germany.

<sup>2</sup>Laboratory of Neural Computation, Istituto Italiano di Tecnologia, Corso Bettini 31, 38068, Rovereto, Italy.

<sup>3</sup>Div. Of Imaging Science and Biomedical Engineering, University of Manchester, M13 9PT Manchester, United Kingdom.

\*Correspondence to: Nelson K. Totah, [nelson.totah@tuebingen.mpg.de](mailto:nelson.totah@tuebingen.mpg.de) or Oxana Eschenko, [oxana.eschenko@tuebingen.mpg.de](mailto:oxana.eschenko@tuebingen.mpg.de)

**Summary:** Understanding the forebrain neuromodulation by the noradrenergic locus coeruleus (LC) is fundamental for cognitive and systems neuroscience. The diffuse projections of individual LC neurons and presumably their synchronous spiking have long been perceived as features of the global nature of noradrenergic neuromodulation. Yet, the commonly referenced “synchrony” underlying global neuromodulation, has never been assessed in a large population, nor has it been related to projection target specificity. Here, we recorded up to 52 single units simultaneously (3164 unit pairs in total) in rat LC and characterized projections by stimulating 15 forebrain sites. Spike count correlations were low and, surprisingly, only 13% of pairwise spike trains had synchronized spontaneous discharge. Notably, even noxious sensory stimulation did not activate the entire population, only evoking synchronized responses in ~16% of units on each trial. We also identified novel infra-slow (0.01-1 Hz) fluctuations of LC unit spiking that were asynchronous across the population. A minority, synchronized possibly by gap junctions, was biased toward restricted (non-global) forebrain projection patterns. Finally, we characterized two types of LC single units differing by waveform shape, propensity for synchronization, and interactions with cortex. These cell types formed finely-structured ensembles. Our findings suggest that the LC conveys a highly complex, differentiated, and potentially target-specific neuromodulatory signal.

1 **Main Text:**

2 In contrast to synaptic transmission-based interactions, neuromodulation has long been  
3 seen as “one-to-many” activity, with neuromodulatory nuclei often considered to be  
4 undifferentiated “state-controllers”. Example *par excellence* is the noradrenergic locus coeruleus  
5 (LC), a diffusely projecting brainstem nucleus containing only approximately 1,600 neurons in  
6 the rat and 10,000 in humans (per hemisphere). The LC, as a part of the ascending reticular  
7 activating system for arousal, is conserved across vertebrates, including teleosts (e.g. zebrafish),  
8 amphibians, birds, and mammals, such as rodents and humans <sup>1,2</sup> (although neurochemical and  
9 neurophysiological differences exist, for example, in cat LC in comparison to the highly similar  
10 rodent and monkey LC <sup>3</sup>). The LC is thought to regulate broad networks related to a multitude of  
11 functions, such as autonomic activity, endocrine function, nociception, sleep and arousal,  
12 perception, attention, decision-making, learning, and memory <sup>4</sup>. Its neurons are considered to act  
13 synchronously to non-specifically modulate the state of neuronal excitability in many forebrain  
14 targets via simultaneous norepinephrine (NE) release <sup>2,3,5-7</sup>. The seemingly undifferentiated  
15 activity of LC has influenced diverse theories ranging from neural control of sleep to  
16 computational models of decision making <sup>5,8-10</sup>.

17 This perspective of global neuromodulation emerged primarily from two lines of  
18 research. The first one comprised anatomical and neurochemical studies demonstrating that the  
19 axons of individual LC neurons branch widely to innervate distant forebrain regions where their  
20 terminals release NE, which can spread up to ~100  $\mu\text{m}$  in the rodent cortex (volume transmission  
21 of NE also occurs in primate cortex although the spread in their larger brain is unknown) <sup>11-14</sup>.  
22 The second line included electrophysiological experiments showing that, in LC, multi-unit  
23 activity (MUA) is synchronized with changes in the local field potential (LFP, a marker of

24 transmembrane currents and other peri-synaptic activity within LC), that were registered  
25 synchronously with spatially segregated electrodes placed in the core of the nucleus<sup>2,15,16</sup>.  
26 Uniform LC cellular activity is seen as the result of (i) shared synaptic input, (ii) gap junction  
27 coupling, and (iii) intrinsic membrane potential oscillations at < 1Hz<sup>15,17,18</sup>. By firing together,  
28 global NE release is thus achieved for the purposes of modulating communication across broad  
29 forebrain circuits and for regulating global states of neuronal excitability<sup>4,7</sup>. In support of this  
30 line of thinking, studies of another neuromodulatory system (i.e., dopamine), have also revealed  
31 a similarly high degree of population synchrony, consistent with the notion that neuromodulatory  
32 neurons broadcast a redundant reward-related, salience, and/or arousal signal<sup>19-28</sup>.

33         Although recent anatomical studies have demonstrated that individual LC neurons could  
34 provide localized forebrain neuromodulation by targeting different cortical sites<sup>29,30</sup>,  
35 synchronous activity across LC neurons would still result in non-specific neuromodulation.  
36 However, prior estimates of synchrony using LC MUA may not be accurate because single units,  
37 which could spike independently, have been averaged over. Single unit recordings in LC,  
38 though, are rare due to technical challenges. Specifically, the small size of the LC has permitted  
39 mainly single wire recordings and the single unit waveforms of the densely packed LC cell  
40 bodies are difficult to isolate using a single recording channel. At present, only one study in the  
41 awake monkey and one study in the anesthetized rat have managed to simultaneously monitor  
42 two single units, and the reported findings were based on small data sets, e.g. ~20 pairs of  
43 neighboring single units recorded on the same electrode<sup>31,32</sup>. According to analysis of cross-  
44 correlograms, the spiking of approximately 80% of the unit pairs was synchronized on the  
45 timescale of 100 – 200 msec, supporting to the notion of highly synchronized spiking among LC  
46 neurons. Evidently, however, recording a small number of pairs (~20) with a single electrode

47 does not allow inferring the degree of synchronicity of a larger LC population. To address this  
48 question, we recorded up to 52 single units simultaneously (234 units and 3164 unit pairs in  
49 total) using a high-density recording array in urethane-anesthetized rats. In addition, we  
50 characterized projection patterns of individual LC units using forebrain electrical stimulation to  
51 evoke antidromic responses.

## 52 **Identification and characterization of two distinct LC single unit types**

53 We isolated 234 single units in 12 rats and recorded 5 to 52 individual LC units  
54 simultaneously (**Table 1**). Single units exhibited typical electrophysiological and  
55 pharmacological characteristics of LC NE-producing cells (**Extended Data Figure 1**). The  
56 extracellular spike waveform shapes of LC single units separated into 2 types based on their  
57 spike width and after-hyperpolarization amplitude (**Figure 1A, B**). We will refer to these  
58 populations as “narrow” and “wide” units. Out of 234 single units, 34 units were narrow (15%)  
59 and 200 units were wide (85%). Interestingly, beyond distinct spike shape profile, these units had  
60 a number of characteristic differences. Narrow units discharged at significantly higher rates  
61 compared to wide units (**Figure 1C, D**; median and s.d.:  $1.28 \pm 0.73$  spikes/sec and  $0.64 \pm 0.63$   
62 spikes/sec, respectively; Wilcoxon-Mann-Whitney,  $Z=4.23$ ,  $p = 0.00002$ , Cohen’s  $D = 0.823$ ,  
63 power = 0.973). The power to detect such an effect size at an alpha level of 0.05 was 97%. Both  
64 unit types were distributed throughout the dorsal-ventral extent of the LC, but narrow units were  
65 relatively more predominant in the ventral aspect of the nucleus (**Figure 1E**). This distribution  
66 was present in all 12 rats. Both narrow and wide units responded to foot shocks with excitation  
67 followed by local NE mediated auto-inhibition, which is typical of LC neurons and all units were  
68 inhibited by clonidine, suggesting that both unit types were noradrenergic (**Extended Data**  
69 **Figure 1**). Moreover, stimulation of forebrain sites elicited antidromic responses in 30% of

70 narrow units and a similar percentage (38%) of wide units (two-sided, Fisher's Exact Test, Odds  
71 Ratio = 1.41, CI = [0.349 5.714],  $p=0.744$ ), further suggesting that both unit types are likely  
72 projection neurons.

### 73 **LC single units have near-zero spontaneous and evoked spike count correlations**

74 While the general consensus is that LC activity is “homogenous”, “uniform” and  
75 “synchronous”<sup>2,3,6,15,16</sup>, the degree of synchrony has not been quantified from a large sample of  
76 LC neurons. Systematic large scale recordings in other brain regions have revealed that the  
77 degree of synchrony is region- and function-specific<sup>33</sup>. Knowing where LC falls on this  
78 continuum of synchrony would provide insight into the representations and computations of its  
79 neurons and the functional role of its output.

80 Although spike count correlations have been measured for cortical neurons<sup>34</sup>, they have  
81 not been quantified in the LC. Earlier recordings, which were limited to a total of 23 LC  
82 neuronal pairs, estimated 80% synchronous discharge by analyzing spike train cross-  
83 correlograms and detecting coincidental spiking over 100 – 200 msec epochs<sup>32</sup>. The best estimate  
84 of LC synchrony, therefore, greatly exceeds the values obtained for cortical cell-pairs, of which  
85 only 16% (32 out of 200 pairs) are reported to have a large central peak in the spike train cross-  
86 correlogram<sup>35</sup>. This yields a correlation coefficients of ~0.05 to 0.1 in cortex<sup>34</sup>. (Note that, when  
87 a spike train cross-correlogram is integrated over sufficiently large lags, the integral  
88 approximates the spike count correlation coefficient<sup>36</sup>). Thus, given the 80% population  
89 synchrony that has been reported among LC spike trains, one might expect relatively LC  
90 correlation coefficients and the proportion of significant correlations to greatly exceed those in  
91 cortex (0.1 and 16%, respectively). In order to establish a quantitative measure of correlated  
92 firing in LC, we calculated the spike count correlation coefficient for 3164 LC single unit pairs.

93 We analyzed spike counts in bins of 200 msec and 1 sec, which were each chosen based,  
94 respectively, on the 100-200 msec duration of coincidental spiking reported in LC cross-  
95 correlograms<sup>32</sup> and the previously demonstrated relationship between rhythmic increases of LC  
96 multi-unit firing in relation to cortical 1 - 2 Hz slow waves<sup>37,38</sup>. The correlation coefficients were  
97 distributed around zero (**Figure 2**). The mean correlation coefficient across all 3164 pairs of  
98 recorded units was  $0.044 \pm 0.001$  for 200 msec bins and  $0.098 \pm 0.003$  for 1 sec bins. Pairwise  
99 correlated variability did not depend on a distance between the units (**Extended Data Figure**  
100 **2A**). One factor to consider is that higher values of correlations are generally reported under  
101 various types of anesthesia and this has been shown to be largely due to the fact that, under  
102 anesthesia, neurons are more locked to slow network activity and/or neuronal population  
103 oscillations<sup>39-43</sup>. To ease this concern, we developed a non-parametric permutation test of  
104 significance of correlations that discounts the spurious correlations due to non-random inter-  
105 spike intervals and common locking to slow oscillations that may arise because of anesthesia.  
106 Only 16% of pairs had synchronous spiking that was significantly higher than what would be  
107 expected to occur by chance (one-sided permutation test,  $p < 0.01$ , see Materials and Methods).  
108 This suggests that synchrony between LC cells, though present, is much weaker and sparser than  
109 expected from previous reports<sup>32</sup>. Given that correlations tend to be larger when firing rate is  
110 higher firing<sup>44</sup>, one possible concern is that within-LC correlations may be sparser and weaker in  
111 anesthetized animals, compared to the awake animal, simply because LC firing rates are slightly  
112 lower under anesthesia. To address this concern, we separately analyzed unit pairs with a  
113 geometric mean rate that was similar to the rate observed in awake rats and non-human primates  
114 (greater than 1 Hz,<sup>2,45-50</sup>). We found that 19.2% of these higher rate pairs ( $N = 506$ ) had  
115 significantly positive correlation coefficients (one-sided permutation test,  $p < 0.01$ ), which was

116 similar to the percentage (15.8%) of lower rate pairs (N = 2658). Thus, our results show that  
117 correlated spiking is not predominant between pairs of LC neurons, even when firing rate is  
118 quantitatively similar to those observed in the awake state. The values of correlation coefficients  
119 suggest that spontaneous LC population activity may not be described as a purely synchronous  
120 pool that broadcasts a homogenous signal.

121         Sensory stimuli evoke burst spiking of LC neurons, which is thought to be a robust,  
122 homogenous population response to each stimulus<sup>16</sup>. In order to study correlations between  
123 evoked LC spiking activity, we applied a single foot shock (5.0 mA, 0.5 msec pulse duration)  
124 and measured spike count correlations during the time window of the maximal evoked discharge  
125 (50 msec after stimulation). The mean evoked spike count correlation was distributed around  
126 zero (**Figure 2**). Increasing the stimulus intensity to 5 pulses (at 30 Hz) did not increase  
127 synchrony (single pulse:  $0.007 \pm 0.006$  versus 30 Hz:  $0.012 \pm 0.006$ , Wilcoxon-Mann-Whitney,  
128  $Z=1.24$ ,  $p = 0.214$ ). Moreover, accounting for possible adaptation by calculating correlations in  
129 blocks of 5 trials (e.g., trials 1 – 5, 6 – 10, and so on) did not demonstrate any propensity for  
130 higher correlations during earlier stimulation trials for either stimulation intensity (single pulse:  
131 Kruskal-Wallis  $H = 0.68$ ,  $p = 0.711$ ; 30 Hz: Kruskal-Wallis  $H = 0.69$ ,  $p = 0.709$ ). Thus, the low  
132 trial-by-trial evoked spike count correlations suggest that individual units respond independently  
133 from each other on every trial. Indeed, within 50 msec after a foot shock a robust population  
134 response is easily observed, yet on average only 16% of units responded on each trial of a single  
135 foot shock (**Figure 3**). The proportion of neurons responding to the stimulus in each trial  
136 remained relatively low when the post-stimulus window was increased to 100 msec (20% of  
137 units) or 200 msec (28% of units). This finding strongly contrasts the prevailing view that many  
138 LC neurons respond - in unison - to sensory stimuli in a phasic population burst.

139           Although the recorded population of LC units exhibited overall weak correlations, we  
140 further examined spike count correlations between pairs of narrow or wide units, as well as  
141 between unit types. Correlations among each type of pair were similar for spontaneous spiking  
142 (Welch's  $F(2,253.81)=1.42$ ,  $p=0.245$ ,  $\omega^2 = 0.0003$ ). Evoked correlations may differ by unit pair  
143 type (but the Kruskal-Wallis test was under-powered,  $H=7.64$ ,  $p=0.022$ ,  $\omega^2 = 0.0003$ , power =  
144 0.175). Post-hoc tests suggest that pairs of mixed unit type may have a more negative median  
145 correlation than pairs of wide type units ( $p=0.017$ ). Nevertheless, the mean correlation values  
146 were near zero for all pair types, which suggests that neither type of LC unit formed a highly  
147 correlated sub-population with other units of the same or different type.

148           Strikingly, a large number of negative spike count correlations emerged during evoked  
149 activity. Furthermore, negatively correlated pairs were observed only when the pair included a  
150 wide unit (**Figure 2, arrows**). Negative spike count correlations, specifically after sensory  
151 stimuli, may reflect lateral inhibition, which is generated by somatic release of NE that inhibits  
152 neighboring neurons via alpha-2 adrenoreceptors<sup>51-53</sup>. Somatic release requires the high  
153 frequency of spiking typically associated with sensory stimuli and not spontaneous activity<sup>54</sup>.  
154 Given that both unit types were responsive to salient stimuli, our results suggest that only the  
155 stimulus-evoked discharge of wide units generates sufficient somatic NE release to cause local  
156 lateral inhibition, but both unit types are noradrenergic and susceptible to lateral inhibition.

### 157 **Synchrony due to putative gap junctions or common synaptic input is rare**

158           The presence of a minority of pairs with highly positive spike count correlations suggests  
159 that at least some LC single units are correlated. Their synchronized activity could be due to  
160 synaptic drive shared by a neuronal pair or electrotonic coupling between the pair<sup>55-59</sup>, which are  
161 both prevalent forms of connectivity in the LC. We assessed the duration of coincidental spiking



162 between unit pairs by measuring cross-correlograms between spike trains. All cross-correlogram  
163 analyses used spontaneous spiking. We chose to study coincident spiking on two timescales, tens  
164 of milliseconds ("broad-type" interactions) or sub-millisecond ("sharp-type" interaction) that  
165 could reflect either common synaptic input or gap junctions, respectively. Shared synaptic input  
166 from a third neuron (or group of neurons) appears, instead, as a zero-centered peak which is  
167 broad (spread over tens of milliseconds)<sup>57</sup>. Gap junctions are associated with a sharp peak that is  
168 shifted 0.5 to 1 millisecond from zero<sup>58-60</sup>. We observed coincident spiking on both timescales  
169 (**Figure 4A**). Cross-correlograms were assessed against a spike time-jittered surrogate (grey and  
170 blue lines, **Figure 4A**).

171 We found that only 13% of unit pairs had significant cross-correlations (**Figure 4B**). Of  
172 those 13% of correlated unit pairs, 60% had broad-type interactions, while 13% had sharp-type  
173 interactions, and the remaining 27% had both broad- and sharp-type interactions. Thus, only 11%  
174 of all 6,299 recorded pairs (interactions considered in both directions) spiked within tens of  
175 milliseconds, which is remarkably low, given an estimate of 80% of LC pairs spiking  
176 synchronously at this timescale based on prior evidence from 23 pairs<sup>31,32</sup>. The proportion of  
177 synchronized LC neurons is similar to the proportion of synchronized cortical neurons reported  
178 as 3.6%, 13%, and 56% under various conditions<sup>55,61,62</sup>.

179 A significantly larger proportion of narrow unit pairs had significant broad-type  
180 interactions in comparison to pairs of wide units and pairs of mixed unit types (**Figure 4B**). This  
181 finding is consistent, in general, with more positive spike count correlations between narrow  
182 units (**Figure 2**). Furthermore, pairs with broad-type interactions had higher spike count  
183 correlations in comparison to pairs with sharp-type interactions and pairs without significant  
184 cross-correlations (**Extended Data Figure 3**). These results are consistent with broad-type

185 interactions and spike count correlations both reflecting common synaptic input. Broad-type  
186 interactions, just like spike count correlations, did not depend on the distance between the unit  
187 pairs and therefore occurred with similar frequency throughout the LC nucleus (**Figure 4C**). The  
188 distance-invariance of correlated activity in LC (**Extended Data Figure 2, Figure 4C**) concurs  
189 with anatomical evidence of many LC neurons integrating broad and non-topographically  
190 organized afferent inputs to the nucleus<sup>63</sup>. Our findings of little correlated activity suggest the  
191 potentially synchronizing influence of shared synaptic input from a broad set of afferents is  
192 somehow limited.

193 We next assessed the dynamics of broad-type interactions by examining the peak times of  
194 the cross-correlograms for pairs with significant interactions. In the example cross-correlograms  
195 (**Figure 4A**), there is a notable diversity in the timing of the interaction in different pairs. The  
196 interaction in **Figure 4A1** was centered at 0 msec, while interactions between other pairs  
197 occurred before 0 msec (**Figure 4A2**) or after 0 msec (**Figure 4A3**). Across the population of all  
198 pairs with significant broad-type interactions, the cross-correlogram peak times were spread over  
199  $\pm 70$  msec (**Figure 4D**). The peak should be centered at 0 msec if common synaptic input jointly  
200 drives the pair<sup>57</sup>. Therefore, neuronal interactions in LC at this timescale may reflect common  
201 synaptic input interacting with other mechanisms that introduce a delay. For example, lateral  
202 inhibition<sup>51,53</sup> between units sharing a synaptic input could delay their correlated synaptic  
203 responses. The local NE release due to discharge of single LC neuron (or a small number of  
204 neurons) inhibits spiking of neighboring LC neurons for  $\sim 100$  msec<sup>53</sup>. The duration of lateral  
205 inhibition demonstrated in this prior work corresponds with the delays observed here for broad-  
206 type interactions (**Figure 4D**), suggesting that lateral inhibition may be responsible for correlated  
207 spiking with a delay.

208 In addition to brief (sub-millisecond to tens of milliseconds) interactions, synchrony  
209 could conceivably occur over multiple seconds or even minutes to hours, given that LC spiking  
210 is related to arousal<sup>2</sup>. We used a data-driven approach to potentially detect synchrony occurring  
211 in long windows ranging from 20 milliseconds to 40 seconds<sup>36</sup>. Based on this analysis, we  
212 examined cross-correlograms over a  $\pm 20$  sec window (against a surrogate of jittered spikes).  
213 However, out of the already limited set of synchronous pairs observed, the vast majority of  
214 synchronous spiking occurred in a window of 70 msec (**Extended Data Figure 4**). Thus, the  
215 time windows we have explored throughout these analyses are sensitive to the timescale of  
216 synchrony in the LC.

#### 217 **Sharp-type interactions are spatially localized**

218 Out of the 13% of cross-correlograms that were significant, 40% were sharp-type  
219 interactions, which is 5% of all recorded pairs. These sub-millisecond interactions between LC  
220 units fell off rapidly with the distance between units, which may suggest a dependence on  
221 electrotonic coupling (**Figure 4C**). A predominant view of LC function is that gap junctions  
222 spread synchrony throughout the LC using collections of electrotonically-coupled neurons<sup>5,17,32</sup>.  
223 Considering the possibility that sharp-type interactions may reflect gap junction coupling (as  
224 others do for cross-correlograms of spike trains recorded in the retina, cortex, and cerebellum,<sup>58-</sup>  
225 <sup>60</sup>), we counted the number of units which exhibited sharp-type interactions with one or more  
226 other units. Out of the units with at least one sharp-type interaction with another unit, 38%  
227 interacted with only this one other unit (i.e., a network of 2 units), 35% interacted with 2 other  
228 units, 16% interacted with 3 other units, and the remaining 11% interacted with 4 to 6 other  
229 units. These findings suggest that synchrony on the timescale of putative gap junctions is  
230 primarily limited to networks of 2 to 3 units, but also as many as 7 units.

231 We assessed the propensity of these networks to produce repeating patterns of spiking  
232 over a few milliseconds, which could be mediated by putative gap junctions (such that some of  
233 unit A's spikes would be consistently followed by unit B spiking around 1 msec later, followed  
234 by unit C spiking around 1 msec after that). Repeating patterns occurred with negligible  
235 frequency. In 2 out of 12 rats, we observed triplets of units that spiked in a consistent order over  
236 4 msec (allowing for 0.4 msec jitter of each spike). Only 1 triplet out of 22,100 possible triplet  
237 patterns (0.005%) was found in one rat and 4 triplets out of 1,330 possible triplet patterns  
238 (0.301%) were found in the other rat. Patterns beyond triplets were never observed. Sharp-type  
239 interactions (possibly reflecting electrotonic coupling) are, therefore, spatially limited.

#### 240 **Spiking of individual LC units oscillates asynchronously at low (< 2 Hz) frequencies**

241 Synchronized rhythmic spiking of LC units could emerge from entrainment with cortical  
242 oscillations. In the cortex, these oscillations are prominent during slow wave sleep and  
243 anesthesia (but also during the awake state) and include a 1 - 2 Hz "delta oscillation" regime and  
244 <1 Hz "infra-slow oscillation" regime<sup>64-70</sup>. LC MUA has been shown to oscillate in these  
245 frequency bands and phase lock to the cortical oscillation leading to the impression that the  
246 majority of LC neurons spike together, entrained with the cortical oscillation<sup>37,38,71</sup>.

247 We first characterized oscillations in the firing rate of LC single units by calculating the  
248 power spectrum of each unit's spike train converted into a continuous spike density function  
249 (SDF, convolution with a 250 msec Gaussian kernel). We calculated the power spectrum of each  
250 single unit SDF and then examined the average power spectrum across all 234 single units  
251 (**Figure 5A**). We observed peaks in the infra-slow frequency band. These peaks reflect rhythmic  
252 fluctuations in spike rate that are predominant in many single units, but not necessarily  
253 synchronous across units. Surprisingly, in contrast to the infra-slow band, we did not observe any

254 distinct peak in the delta oscillation frequency band. This result is unexpected in light of previous  
255 studies, which have found that LC multi-unit spike rate oscillated in this range<sup>37,38,71</sup>. In order to  
256 understand the relationship between the activity of LC single units and cortical delta oscillations,  
257 we first compared our results with prior studies of LC multi-unit spike rate by merging all  
258 simultaneously recorded spike trains into a single multi-unit spike train and converting that to a  
259 SDF (250 msec Gaussian kernel). In line with previous studies, we observed that LC multi-unit  
260 spike rate did oscillate in the delta frequency band (**Figure 5B**). Out of 8 rats with spiking during  
261 cortical delta oscillations, all 8 of the multi-unit signals were significantly phase locked  
262 (Rayleigh's Z test,  $p < 0.05$ ) to the cortical LFP delta oscillations (**Figure 5C**). Our results  
263 demonstrate that if only multi-unit spiking is measured (as is typical in LC recordings), the data  
264 suggest that LC neurons respond synchronously along with cortical oscillations; however, our  
265 data reveal that this is not the case at the single unit level. In spite of LC single units not  
266 exhibiting spike rate fluctuations at  $\sim 1 - 2$  Hz (**Figure 5A**), approximately 69% of single units  
267 were significantly phase locked to the cortical delta (Rayleigh's Test for Circular Uniformity,  
268  $p < 0.05$ ). Individual LC neurons, therefore, respond during periodic (1 - 2 Hz) transitions to states  
269 of heightened cortical excitability, but each on different cycles rather than as a synchronized,  
270 rhythmically fluctuating population which yields no 1 - 2 Hz peak in the single unit power  
271 spectrum.

272         Similar proportions of each unit type (70% of wide units and 66% of narrow units) were  
273 phase locked (two-sided Fisher's Exact Test, Odds Ratio=1.23, CI=[0.470 3.202],  $p=0.803$ ).  
274 Notably, narrow units responded significantly earlier in the cortical delta oscillation (Watson-  
275 Williams test for equal circular means,  $F(83)=40.959$ ,  $p < 0.0001$ ; **Figure 5D**). Narrow units  
276 responded during the LFP delta oscillation trough to peak transition, while wide units responded

277 closer to the LFP peak; thus, in contrast to the canonical thinking that LC neurons act  
278 homogenously to precipitate up states, we show that each unit type may make differing  
279 contributions to neuromodulation of cortical excitability<sup>7,37,38</sup>.

280 Intriguingly, we observed strong single unit spike rate oscillations in the infra-slow  
281 frequency band (**Figure 5A**), specifically at 0.09 Hz (periods of 11 sec) and 0.4 – 0.5 Hz  
282 (periods of around 2 sec), which were readily observable in SDF's (**Figure 5G, top panel**).  
283 Additional examples for the 0.09 Hz oscillations are presented in **Extended Data Figure 5**. Both  
284 unit types oscillated at these frequencies and narrow units also oscillated at additional  
285 frequencies between 0.1 and 0.2 Hz (**Figure 5E**). The infra-slow oscillations were coherent  
286 between pairs of units (**Figure 5F**). Strong coherence between unit pairs suggests that  
287 synchronous spiking of LC unit pairs may occur at infra-slow oscillatory time scales. Therefore,  
288 we next examined the phase relationship of the spike rate oscillations between LC units in the  
289 infra-slow range. Spiking of the majority of pairs (73% for 0.4 - 0.5 Hz and 67% for 0.09 Hz)  
290 oscillated coherently with a stable phase relationship (Rayleigh's Test for Circular Uniformity,  
291  $p < 0.05$ ). The three examples exhibited stable phase relationships, with one pair's spiking  
292 fluctuating synchronously (in-phase at nearly 0 degrees phase difference), whereas other pairs  
293 responded in a stable anti-phase pattern (180 degrees phase difference) such that their spiking  
294 was consistently in opposition (asynchronous) over infra-slow time scales (**Figure 5G, bottom**  
295 **panel**). At the population level (all 3,164 pairs), the mean phase relations across all pairs were  
296 distributed uniformly for spike rate oscillations at both 0.09 Hz (Rayleigh's  $Z=2.531$ ,  $p=0.080$ )  
297 and 0.4 – 0.5 Hz (Rayleigh's  $Z=1.074$ ,  $p=0.342$ ). These data indicate that most pairs exhibit  
298 coherent oscillations, but only a small portion oscillate synchronously (in-phase), yielding little  
299 oscillatory synchrony at the whole population level.

## 300 **LC single units exhibit complex population patterns and form ensembles**

301           Although we have found multiple lines of evidence that LC single units do not respond  
302 synchronously, it is in principle possible that the LC contains smaller groups of units with  
303 synchronized activity, that is, cell ensembles. For example, we observed a minority of highly  
304 correlated unit pairs (long right tails in the spike count correlation coefficient distributions in  
305 **Figure 2** and 13% of pairwise cross-correlograms were significant in **Figure 4**). To explore this  
306 further, we measured the coupling of single unit spiking to the spiking of the population (all  
307 remaining units) with 1 msec resolution. Population coupling measures the number of spikes that  
308 occur in the population in the same msec as a single unit spike<sup>72</sup>. During spontaneous activity,  
309 population coupling varied across individual single units. For example, the spiking of example  
310 Unit A was highly synchronous with other units in the population (Z-score at time 0 is ~13),  
311 whereas example Unit B was uncoupled ( $Z < 2$  at time 0) from the population (**Figure 6A**). The  
312 distribution of Z-scores at 0 msec across all single units indicated the presence of both uncoupled  
313 single units (34% of units had  $Z < 2$ ) and population coupled units (**Figure 6B**). Population  
314 coupling suggests that some sub-sets of multiple units may be synchronously active as  
315 ensembles. The one millisecond timescale of population coupling suggests that ensembles may  
316 be active on extremely brief scales.

317           Sensory stimulation is thought to evoke synchronous discharge of many LC neurons<sup>16</sup>  
318 and should therefore result in strong population coupling for most single units. Astonishingly,  
319 foot shocks did not cause coupling of a large number of single units to the population (**Figure**  
320 **6C, D**), suggesting a lack of synchronous population discharge to sensory stimuli at a msec time  
321 scale, in line with our earlier pairwise analysis (**Figure 2B, 2C, Figure 3**).

322 We next attempted to detect and discriminate which LC units formed correlated sub-  
323 populations spiking together as ensembles using graph theory analysis. We observed ensembles  
324 in each set of simultaneously recorded units (**Figure 6E**). We identified a total of 23 ensembles,  
325 ranging from 1 to 3 per rat, and consisting of 2 to 9 units per ensemble. Ensembles were most  
326 likely due to distance-invariant shared synaptic inputs (**Extended Data Figure 2, Figure 4C**),  
327 which contributed the majority of correlated activity in the nucleus; correspondingly, LC unit  
328 ensembles were spatially diffuse (**Extended Data Figure 6**). Surprisingly, the units in an  
329 ensemble often consisted of the same unit type (**Figure 6F**).

### 330 **A minority of correlated single units provide targeted forebrain neuromodulation**

331 We examined the degree to which correlated units have overlapping projection targets.  
332 We assessed the projection properties of LC cells by applying direct electrical stimulation in up  
333 to 15 forebrain sites. Example spike rasters showing antidromic responses, latencies to respond,  
334 number of projection targets, and firing rates of units based on projection target are shown in  
335 (**Extended Data Figure 7**). The mean latencies for each projection target are consistent with the  
336 prior literature<sup>73-75</sup>. In general, positively or negatively correlated unit pairs (those with  
337 significant correlation at  $p < 0.01$ , permutation test) did not have any greater tendency for both  
338 units to jointly project to overlapping forebrain targets (**Figure 7A, B**). Additionally, pairs with  
339 broad-type interactions (assessed by spike train cross-correlograms) did not relate to the degree  
340 of target overlap between units (**Figure 7C**). However, pairs with sharp-type interactions were  
341 more likely to project to the same target (**Figure 7D**). Significantly more pairs with sharp-type  
342 interactions (88%) than non-interacting cell pairs (72%) had overlapping projections to the same  
343 forebrain zone (Cohen's  $D = 0.55$ , one-sided Fisher's Exact Test,  $p = 0.075$ ). Out of the unit pairs  
344 with overlapping projection zones (e.g., any division of prefrontal cortex or sensory cortex or



345 thalamus), cell pairs had a similar tendency to project to cortex more than thalamus and  
346 prefrontal cortex over sensory cortex (**Figure 7D, inset**).

347

## 348 **Discussion**

349

350 *The LC contains multiple, functionally differentiated cell types*

351 We observed two types of LC units that differed by waveform shape, firing rate,  
352 propensity for synchronization, and interactions with cortex. The cell types also had remarkably  
353 different dorsal-ventral distributions within the LC. Our findings provide at least three lines of  
354 evidence that these cell populations may have different functions. First, we found that each cell  
355 type has unique local circuit properties, namely narrow and wide units have differing capabilities  
356 to cause local NE-mediated lateral inhibition and oscillatory firing rate changes (spike-spike  
357 coherence) at different frequencies. Second, we revealed that each cell type tended to form  
358 ensembles with other cells of the same type. Third, we observed differential phase locking to  
359 cortical oscillations, which may imply distinct roles in modulating cortical excitability. This  
360 latter finding suggests that the activity of LC narrow units (which were locked to an earlier phase  
361 of cortical LFP delta oscillations and had a higher firing rate that should release more NE) could  
362 function as a cell type-specific mechanism for regulating cortical excitability in a more selective  
363 manner than is commonly attributed to neuromodulatory systems<sup>7</sup>. Although anesthesia also  
364 alters cortical LFP<sup>76,77</sup>, delta oscillations appear very similar in the awake, sleeping, and  
365 anesthetized rodent<sup>64-66</sup>. Further investigation of the relationship between cortical LFP and LC  
366 cell types during natural states of wakefulness and sleep is warranted now that these LC cell  
367 types have been described.

368           The significance of multiple LC cell types remains to be seen. Although their  
369 morphological, genetic, and membrane electrophysiology characteristics cannot be resolved with  
370 extracellular recordings, our work reveals a new level of diversity among LC single units. This  
371 diversity introduces many outstanding questions -- from the local circuit and afferent  
372 connectivity principles that underlie formation of LC cell type-specific ensembles -- to how LC  
373 ensemble activity patterns modulate forebrain targets. Recent work suggests that separate LC  
374 ensembles may modulate distinct forebrain targets to control different behaviors <sup>78</sup>.

375

376 *Population synchrony occurs among a small proportion of LC neurons*

377           Correlations have been consistently reported between neuronal pairs within many brain  
378 structures and are thought to be a defining feature of neural population activity. The strength of  
379 correlation varies across brain regions and may have profound influences on the time scales of  
380 the computations that neuronal ensembles perform and the functional relevance of their output <sup>33</sup>.  
381 The most prominent hypothesis is that the LC <sup>2,3,5,6,22</sup> and, in general, other neuromodulatory  
382 nuclei <sup>28</sup> may be at the higher end of correlation strength.

383           We detected synchronous activity among only 16% of cell pairs (~ 3000) and observed  
384 spike count correlation coefficients that were, on average, 0.04. Furthermore, strong noxious  
385 stimulation (electric foot shock) was expected to evoke a synchronized response of the entire LC  
386 population, but we instead observed that a relatively small proportion (~16%) of units  
387 contributed to the population response on each trial. Correlations decrease with lower firing rates  
388 <sup>44</sup> and urethane anesthesia is known to reduce spike rate by weakly effecting synaptic and non-  
389 synaptic currents <sup>40,65,79-81</sup>. We report spike rates (mean 0.89 Hz), which were not far below  
390 what occurs during the awake state (reported means range from 0.92 Hz to 1.4 Hz in the rat and

391 monkey<sup>2,45-50</sup>). Moreover, when we considered correlations among only pairs with firing rates  
392 over 1 Hz, the proportion of correlated pairs remained similarly small (19.2%). Even more  
393 strikingly, similar levels of correlation were obtained for spontaneous and evoked firing (with the  
394 latter eliciting much higher spike rates), which further strengthens the view that LC synchrony  
395 may be much lower than previously assumed. Regardless of the anesthesia effects on the firing  
396 rate, many studies across many types of anesthetics, brain regions, and species have suggested  
397 that anesthesia actually increases spike count correlation coefficients by effecting large scale  
398 fluctuations of population activity<sup>39-42</sup>. Thus, our finding of such low synchrony under  
399 anesthesia is unexpected. Building upon our findings, future work should test the hypothesis that,  
400 in the awake state and without the strong network fluctuations associated with urethane  
401 anesthesia or slow wave sleep, LC synchrony is further reduced.

402         The presumption about a robust LC synchrony originated from an earlier study, which  
403 estimated that the activity of 80% of LC cell pairs was synchronized over ~100 milliseconds; yet  
404 this estimation was based on a relatively small number (~20) of pairs recorded in the awake  
405 monkey<sup>32</sup>. We also report that correlated activity was primarily focused in the timescale of less  
406 than 100 milliseconds based on spike train cross-correlograms assessed over a large range from  
407 0.5 milliseconds to 40 seconds. Critically, however, the proportion of the population that was  
408 synchronized (16%) was much lower than the previous report (80%) when a larger population  
409 (>3000 pairs) was studied. Correlation strength is known to vary across brain regions and  
410 knowledge of the correlation structure in the LC lays the groundwork for understanding better  
411 the representations and computations of LC neurons and the functional role of noradrenergic  
412 neuromodulation by LC ensembles.

413

414 *Gap junctions as a mechanism underlying LC ensemble activity*

415       Prior accounts have emphasized gap junctions as the source of synchrony in LC<sup>5,17,32</sup>;  
416 however, we found little evidence to support this assumption. Numerous studies, which have  
417 inactivated gap junctions, conclusively demonstrate that the brief (0.5 to 1 millisecond) cross-  
418 correlogram peaks reflect gap junction coupling<sup>58-60</sup>. In our data, we observed this sharp sub-  
419 millisecond cross-correlogram profile that may reflect putative gap junctions between LC  
420 neurons. However, the lack of sub-millisecond interactions beyond two neurons, as well as the  
421 rapid decay of sharp type interactions with distance each suggests that gap junctions are not  
422 likely to spread synchrony throughout the LC. It is unlikely that anesthesia interfered with  
423 observations of gap junction interactions. Although synchrony due to longer duration synaptic  
424 events (e.g., drive by common synaptic input to a cell pair) could be missed when spike counts  
425 are reduced under anesthesia (but see<sup>39-42</sup>), synchrony due to brief events (e.g., driven by gap  
426 junctions) should not be affected by anesthesia-induced spike count suppression.

427       Intriguingly, it is possible that the gap junctions in the LC actually contribute to  
428 population desynchronization and the existence of simultaneously active LC ensembles. Systems  
429 that are coupled through gap junctions are certainly predisposed to exhibit synchronous changes  
430 of both membrane potential and spike probability<sup>82</sup>. Recordings of the relatively deafferented  
431 LC in slice (*in vitro*) recordings have demonstrated exactly such gap junction-synchronized  
432 membrane potentials<sup>17</sup>. However, when whole-brain afferent input is present (as in our  
433 experiments) and the neurons have action potentials with a large amplitude after-  
434 hyperpolarization (as is the case for LC neurons<sup>30</sup>), an excitatory afferent input can phase shift  
435 the relation between neurons' membrane potentials, which results in both desynchronization at  
436 the population level as well as only sub-sets of neurons (ensembles) that are synchronized<sup>82</sup>.

437 Thus, our results do not support the view that gap junctions enable massive population  
438 synchrony in LC, but do not exclude their contribution to synchronize activity within distinct cell  
439 ensembles.

440

441 *Common synaptic inputs and local lateral inhibition may interact to promote LC synchrony*

442 In addition to the sub-millisecond cross-correlogram peaks, we also observed cross-  
443 correlogram peaks over tens of milliseconds. These interactions over longer time scales may  
444 reflect a cell pair interaction with a third neuron (or group of neurons) that provides shared  
445 synaptic input to the pair. Intriguingly, we observed that these longer duration interactions were  
446 temporally diverse, spanning a range from 10 to 70 msec and lasting variable durations. While  
447 anesthesia could have caused under-sampling of the overall number of unit pairs synchronized  
448 by long duration synaptic events like common synaptic input, the existence of this temporal  
449 diversity of pairwise interactions is unlikely to be affected by anesthesia.

450 We propose that this delayed synchrony is due to a combination of shared synaptic inputs  
451 and lateral inhibition. A comparable time delay ( $\pm 70$  msec) has been previously reported in spike  
452 train cross-correlograms from paired intracellular slice recordings<sup>17</sup>. In that work, the delayed  
453 cross-correlogram peaks did not occur when local LC activity was prevented, which is a  
454 manipulation that would remove local lateral inhibition. Moreover, the duration of lateral  
455 inhibition corresponds to this  $\pm 70$  msec delay<sup>53</sup>. Thus, our findings suggest the possibility that  
456 synchrony in the LC depends on the cooperation of shared synaptic inputs (extra-LC) and lateral  
457 inhibition (intra-LC). Wide type LC cells may be a crucial controller of LC synchrony given our  
458 findings that the wide type units may be the source of lateral inhibition.

459

460 *The mechanisms underlying the desynchronized population response to sensory stimuli*

461 Our observations provide the first experimental evidence that LC single units do not  
462 spike synchronously in response to a noxious somatosensory input (foot shock). This result is  
463 surprising given that noxious sensory stimuli generate strong synaptic input across LC neurons,  
464 which is expected to drive correlated spiking among them. Noxious somatosensory stimuli are  
465 conveyed by both direct afferents from the dorsal horn neurons in the spinal cord (peripheral  
466 nociception) and the brainstem sensory trigeminal nuclei (peripheral nociception from the head)  
467 <sup>83</sup>, as well as indirect (di-synaptic) nociceptive input from the rostral medulla <sup>84</sup>. In both cases,  
468 single afferents synapse onto many LC neurons. We speculate that the desynchronized response  
469 to sensory stimulation may depend on each cell's pre-stimulus membrane potential, which may  
470 be in a different state prior to each sensory stimulus. We propose that this could occur given that  
471 LC neurons receive a diverse mixture of excitatory and inhibitory afferents from many brain  
472 regions – inputs that may be asynchronous (and/or opposing in excitatory/inhibitory valence)  
473 with respect to each other <sup>63,84,85</sup>. Furthermore, refractory periods, self-inhibition, and lateral  
474 inhibition could set LC neurons to a dynamic mixture of membrane potentials. Thus, LC neurons  
475 that are in a higher state of excitability may spike and then inhibit other LC neurons from  
476 responding to the foot shock through lateral inhibition <sup>51,53,86</sup>.

477 It is unlikely that sensory stimuli in other modalities, which only elicit a LC response in  
478 the awake state (e.g., non-noxious auditory, visual, and somatosensory stimuli <sup>49</sup>), would evoke  
479 greater synchronous spiking than foot shocks do under anesthesia. Somatosensory stimulation  
480 that is milder than the noxious foot shocks we used here is not likely to evoke more robust LC  
481 responses in awake state. It is possible that stimulation that is close to the physiological limit  
482 may increase the probability of a synchronized population response <sup>87</sup>. Visual and auditory

483 stimuli evoke synaptic responses in the LC via a longer poly-synaptic pathway<sup>88-90</sup>. The  
484 synaptic delays and the noise added by synaptic transmission at each step are expected to jitter  
485 the timing of common synaptic input to LC cell pairs and, thus, reduce synchronized spiking.  
486 These questions should be resolved by recording large numbers of single units from the awake  
487 animals.

488

#### 489 *Potential for targeted neuromodulation by LC ensembles*

490         Contrary to the current view of the LC as a non-specific neuromodulatory system, our  
491 data suggest that targeted forebrain neuromodulation could possibly be achieved by selective  
492 activation of gap junction coupled LC cell assemblies that share common efferent targets. We  
493 showed that unit pairs with synchronous activity on the sub-millisecond timescale were more  
494 likely to project to similar forebrain regions. We also observed a tendency for anti-correlated  
495 units, which spike in opposition with one another, to avoid projecting to the same forebrain  
496 areas. These data are consistent with targeted neuromodulation under a scenario in which one  
497 population of units projects heavily to the forebrain Region A, while another population avoids  
498 Region A and projects heavily to Region B. During times when the A-projecting population is  
499 active, NE content in Region A increases while the B-projecting population is suppressed and  
500 NE content in Region B decreases.

501         Targeted forebrain neuromodulation may also be achieved by NE gradients between  
502 forebrain sites, which could be generated by infra-slow (<1 Hz) oscillations in spike rate. Our  
503 results demonstrate that LC neurons will have in-phase spike rate oscillations within their group  
504 and anti-phase spike rate oscillations with neurons outside their group. Thus, over an infra-slow  
505 duration (2 to 10 sec), some LC neurons will synchronously release NE to their projection

506 targets, while other LC neurons are suppressed. Depending on their projection targets (which can  
507 often be single forebrain regions according to our data and others<sup>29</sup>), NE could be  
508 simultaneously high in some forebrain regions and simultaneously low in others over a timescale  
509 of 2 to 10 sec.

510 We also speculate that these infra-slow changes in LC spike rate could orchestrate infra-  
511 slow LFP, EEG, or BOLD oscillations in multiple cortical regions and promote communication  
512 among these regions by synchronizing their infra-slow oscillations in order to organize  
513 functional (or resting state) networks<sup>67-70,91,92</sup>. LC spiking (and associated NE release) regulates  
514 cortical excitability; coherent infra-slow oscillations of LC spike rate among sub-sets of LC  
515 neurons may therefore allow different LC ensembles to influence synchronization among the  
516 regions in separate cortical networks. Our data thus provide experimental support for a  
517 theoretically predicted, but speculative function of the LC to organize task-related and resting  
518 state networks<sup>67,93,94</sup>. Given that different LC cell types spiked coherently at different infra-slow  
519 frequencies, it is possible that narrow and wide cell types participate differentially in resetting  
520 cortical networks. Additionally, vascular innervation by LC neurons may directly affect the  
521 hemodynamic response and alter the physiology underlying the generation of the fMRI BOLD  
522 signal used to study cortical networks. The physiology of the BOLD signal, which is a common  
523 research and diagnostic tool, may be better understood when future studies establish how LC  
524 neurons – and especially the different LC cell types reported here – modulate cortical network-  
525 specific neurovascular coupling.

526 Lastly, our findings do not contradict the long-standing notion of global NE  
527 neuromodulation. Volume NE release may provide simultaneous post-synaptic  
528 neurotransmission in distant brain regions on a time scale of a few seconds<sup>11,95</sup>. This global and



529 relatively slow neuromodulation is clearly synchronous by nature and presents a critical  
530 component of controlling brain state and neuronal excitability, especially on behaviorally  
531 relevant timescales (seconds, minutes, or hours). In addition to its role in global  
532 neuromodulation, the LC system appears to be anatomically and functionally differentiated with  
533 diverse cell types and finely-structured activity patterns. These features may allow a more  
534 nuanced role for the LC in theories of systems and cognitive neuroscience.

535

## 536 **Methods**

### 537 **Animals**

538 Twelve male Sprague-Dawley rats (350 - 450 g) were used. All experimental procedures  
539 were carried out with approval from the local authorities and in compliance with the German  
540 Law for the Protection of Animals in experimental research (Tierschutzversuchstierverordnung)  
541 and the European Community Guidelines for the Care and Use of Laboratory Animals (EU  
542 Directive 2010/63/EU).

### 543 **Anesthesia and Surgical Procedures**

544 Rats were anesthetized using an intra-peritoneal (i.p.) injection of a 1.5 g/kg body weight  
545 dose of urethane (Sigma-Aldrich, U2500). Oxygen was administered. The animal was placed on  
546 a heating pad and a rectal probe was used to maintain a body temperature of 37 C. The eyes were  
547 covered in ointment. After removal of the skin, the skull was leveled to 0 degrees, such that the  
548 difference between lambda and bregma was less than 0.2 mm.

### 549 **Stereotaxic coordinates and electrode placement**

550 Craniotomies were made at the locations listed in the following table (**Extended Data**  
551 **Table 1**). Accurate electrode placement was confirmed by examining the firing properties of

552 neurons in each brain region. In the LC, these criteria included a slow spontaneous firing rate,  
553 biphasic response to noxious sensory stimuli (foot shock), audible presence of jaw movement-  
554 responsive cells in the MeV (Mesencephalic Nucleus of Cranial Nerve V) with undetectable  
555 single units (<0.2 mV). LC electrode placements were later verified using histological  
556 examination of brain tissue sections (**Extended Data Figure 8**). Placement of electrodes for  
557 forebrain stimulation was stereotactically-guided and, when possible, electrophysiological  
558 criteria were used to verify target placement.

### 559 **Electrodes**

560 Stimulation of cortical and sub-cortical brain regions was conducted via tungsten  
561 electrodes with low impedance (10 - 50 kOhm) to prevent heating at the electrode tip. Tungsten  
562 electrodes with a diameter of 200  $\mu\text{m}$  (FHC, Model: UEWMFGSMCNNG) were ground at the  
563 tip to lower impedance to this range. Recording from the LC used a 15  $\mu\text{m}$  thick silicone probe  
564 with 32 channels (NeuroNexus, Model: A1x32-Poly3-10mm-25s-177-A32). The channels were  
565 implanted toward the anterior aspect of the brain. Each channel was separated from the  
566 neighboring channels by 25  $\mu\text{m}$ . Channels were divided into 10 tetrodes with one channel  
567 overlapping per tetrode (**Extended Data Figure 1**). The 275  $\mu\text{m}$  extent of the recording channels  
568 covered nearly the entire dorsal-ventral extent of the LC, which is  $\sim 300 \mu\text{m}$ <sup>96,97</sup>.

### 569 **Recording and signal acquisition**

570 A silver wire inserted into the neck muscle was used as a reference for the electrodes.  
571 Electrodes were connected to a pre-amplifier (in-house constructed) via low noise cables. Analog  
572 signals were amplified (by 2000 for LC and 500 for cortex) and filtered (8 kHz low pass, DC  
573 high pass) using an Alpha-Omega multi-channel processor (Alpha-Omega, Model: MPC Plus).

574 Signals were then digitized at 24 kHz using a data acquisition device CED, Model:

575 Power1401mkII). These signals were stored using Spike2 software (CED).

### 576 **Spike detection**

577 The recorded signal for each channel was filtered offline with a four pole butterworth  
578 band pass (300 - 8000 Hz). Spikes were then detected as crossings of a negative threshold that  
579 was four times the standard deviation of the channel noise. Noise was defined as the median of  
580 the rectified signal divided by 0.6745<sup>98</sup>. Detected spike waveforms were stored from 0.6 msec to  
581 1.0 msec around the threshold crossing. This duration was chosen based on the known action  
582 potential duration of rat LC neurons<sup>2,99</sup>. A 0.6 msec refractory period was used to not detect a  
583 subsequent spike during this window.

### 584 **Spike clustering**

585 Spike waveforms were clustered using an automatic clustering algorithm and then  
586 manually refined and verified using cluster visualization software (CED, Spike 2). Automated  
587 clustering was performed using Wave\_Clus<sup>98</sup> in MATLAB (default parameters for clustering)  
588 followed by manual refinement and verification in clustering visualization software. This method  
589 uses wavelets to decompose the waveform into a simpler approximation of its shape at different  
590 frequencies (wavelet scales) and times in the waveform. Using this method, small amplitude  
591 bumps or deflections at different time points in the waveform can be used to cluster waveforms  
592 together, if they are a highly informative waveform characteristic. After the automated sorting,  
593 manual refinement of clustering using a 3-dimensional plot of principle components or the  
594 amplitude at particular waveform time points (peaks and troughs). Auto-correlograms were used  
595 to assess the level of noise (refractory period violations) and cross-correlograms between  
596 simultaneously recorded units were used to prevent over-clustering<sup>100</sup>.

## 597 **Detection of spikes across tetrodes**

598           Due to configuration of the recording array with a high-density of electrode contacts, the  
599 spikes from the same LC neuron could be detected on more than one tetrode. In such situations,  
600 we first attempted to merge the spike trains across multiple tetrodes. Merging the spike trains  
601 potentially originating from the same neuron and detected on multiple tetrodes should reduce  
602 false negatives (missing spikes), as it is common for PCA of waveforms to miss some spikes  
603 even if they are part of a well isolated cluster. The assumption is that different spikes are missed  
604 on different tetrodes, which were subjected to separate PCA's during clustering. Therefore,  
605 spikes missed by PCA on one tetrode could be partly filled in by spikes that were detected on  
606 other tetrodes, providing that the tetrodes were recording the same single unit. Merging spike  
607 trains across tetrodes operated on the principle that, if the spikes from the same neuron are  
608 recorded, for example, on 3 adjacent tetrodes and the spike waveforms can be classified into 3  
609 well-isolated clusters, then the spike trains can be merged to yield an equally well-isolated unit.  
610 Furthermore, merging across spike trains allows units to be tracked if they drift away from one  
611 tetrode and become closer to another tetrode. However, the merging procedure needs to avoid  
612 inclusion of contaminated spikes originating from neighboring cells. Therefore, merged spike  
613 trains must be statistically tested for false positives and conservatively discarded. Unit cluster  
614 contamination from other units are typically detected by the presence of spikes during the  
615 refractory period. Thus, if the merged spike train did not meet criteria for a single unit activity,  
616 then we kept the unit recorded on the tetrode with the least noise (lowest proportion of spikes  
617 during refractory period).

618           The merging process consisted in the following steps. First, the cross-correlograms were  
619 computed at the sampling rate of the recording (0.04 ms bin width) between the spike trains of a

620 cluster isolated from one tetrode (“reference” cluster) and all other clusters isolated from all  
621 remaining tetrodes. If the spike trains associated with the two clusters contained spikes from the  
622 same unit, then the majority of spikes would have identical timing with the vast majority (>90%)  
623 of spikes being coincidental at time 0 (with a few sampling points of error) and the remaining  
624 spikes being spikes either detected on one tetrode and missed on the other or cluster noise from  
625 other units. Prior recordings using high-density linear electrodes have used cross-correlograms to  
626 simply discard one of the trains<sup>101</sup>; however, we used merging across tetrodes to reduce missed  
627 spikes. In the case that the "reference" and "other" spike trains were mostly coincidental spikes,  
628 we attempted to merge them using a procedure, as follows. The coincident spikes in the  
629 reference spike train were deleted and the remaining reference spikes were merged with the  
630 spikes from the other spike train, resulting in a new "merged" spike train. The amount of noise  
631 (number of spikes during the refractory period) and total number of spikes in the train were  
632 recorded for the original "reference" spike train, original "other" spike train, and newly merged  
633 spike train. A Fisher’s Exact Test was performed to statistically assess if the proportion of  
634 contaminated spikes added by merging is significantly greater than the proportion of noise  
635 (refractory period) spikes in either the original reference spike train or the original other spike  
636 train. The Fisher's test was run separately for merged versus reference and the merged versus  
637 other spike trains. A result of non-significance (with alpha set to 0.01 and a right-sided test) for  
638 *both* the original reference spike train and the original other spike train indicated that the original  
639 spike trains do *not* have *greater* odds of having noise than the merged spike train. In this case,  
640 the merged train may be kept because the amount of noise was not increased beyond its level in  
641 the original two trains. The original spike trains were discarded. However, if the test is  
642 significant for either of the original trains, then either the reference spike train or the other spike

643 train is kept depending on which has a lower percentage of spikes during the refractory period  
644 out of the total number of spikes. The merged spike train was discarded. The merging procedure  
645 was repeated for each cluster from each tetrode until conflicts no longer existed.

#### 646 **Characterization of LC units**

647 Single units were identified using typical criteria (**Extended Data Figure 1**). These criteria  
648 were low firing rate (0.89 spikes/sec) and a characteristic bi-phasic response (excitation followed  
649 by inhibition) to sensory stimuli. The neurochemical nature of LC units was identified by the  
650 presence of auto-inhibitory alpha-2 adrenergic receptors which were activated using the alpha-2  
651 agonist, clonidine. Electrode tracks approaching LC were visualized (**Extended Data Figure 8**).  
652 These methods are the standard for demonstrating that the neurons are likely to be LC-NE  
653 neurons. Therefore, our results are comparable with the existing literature on the LC and we  
654 were likely sampling mostly LC-NE neurons.

#### 655 **Assigning unit location on recording array**

656 Isolated single units were assigned a channel location on the electrode array according to  
657 which electrode measured the highest mean waveform amplitude (averaged from all spikes). In  
658 the case of single units with spikes that were merged across tetrodes, a list tracked the tetrodes on  
659 which the unit appeared and the location was assigned to the channel with the maximum  
660 amplitude when considering all of the tetrodes that recorded the unit. The spacing between all 32  
661 channels was 25  $\mu\text{m}$ , which allowed us to use Pythagoras' Theorem to calculate a distance  
662 between channels on the array. The distance between each unit's maximal waveform amplitude  
663 was used to measure the distance dependence of spike count correlations and cross-correlograms.

664 We inferred the spatial probability distribution of narrow and wide units on the array by  
665 fitting  $N^{\text{th}}$ -order polynomials ( $N = 2$  to  $9$ ) to the proportion of each unit type recorded at each of

666 the 10 tetrodes. We found that  $N = 5$  or  $6$  produced an  $R^2$  that was  $> 0.9$ , whereas lower  $N$  had  
667 poor fits ( $R^2=0.3$  to  $0.7$ ) and larger  $N$  visually overfit the data. The polynomial function provided  
668 a probability, which we verified in all rats by removing one rat and re-calculating the fit until all  
669 rats had been removed once (jackknife error). In all cases, except one,  $R^2$  was  $>0.9$ .

### 670 **Sensory stimuli**

671       Sensory stimuli were foot shocks delivered to the contralateral hind paw. Pulses were  
672 square, biphasic, and  $0.005$  msec duration at  $5$  mA. Pulses were delivered at two frequencies  
673 (single pulse or five pulses at  $30$  Hz) delivered in random order. Fifty trials of foot shock stimuli  
674 were delivered with an inter-trial interval of  $2000\pm 500$  msec.

### 675 **Intra-cranial stimulation**

676       Brain regions were stimulated in a random order. Pulses were square, biphasic, and  $0.25$   
677 msec duration over a range of intensities ( $400 - 1200 \mu\text{A}$ ), which were delivered in a randomized  
678 order. The pulse waveforms were constructed in Spike2 (CED) and delivered via a current  
679 generator (in-house constructed), which allowed recording of the stimulation voltage at the tip of  
680 electrode, which was also digitized and stored and used to verify stimulation. Stimulation was  
681 delivered with an inter-trial interval of  $2000\pm 500$  msec. At least  $50$  trials of each intensity were  
682 delivered for each brain region.

### 683 **Administration of clonidine**

684       At the end of the recording, a  $0.5$  mg/kg dose of the alpha-2 adrenergic agonist clonidine  
685 was injected i.p. (Sigma-Aldrich, product identification: C7897). The recording was continued at  
686 least until all activity, included multi-unit activity, ceased.

### 687 **Histology**

688 Rats were euthanized with pentobarbital sodium (Narcofen, Merial) via an i.p. injection  
689 (100 mg/kg). The rats were then trans-cardially perfused with 0.9% saline and then 4%  
690 paraformaldehyde (PAF) in 0.1M phosphate buffer (pH 7.4). The brain was removed and stored  
691 in 4% PAF. Brains were moved into 30% sucrose, until they sank, before sectioning on a  
692 freezing microtome (Microm, model: HM 440E). Coronal sections (50  $\mu$ m thick) were collected  
693 into 0.1M phosphate buffer and directly stained. For sections containing the LC, alternating  
694 sections were stained for Nissl substance or the catecholamine synthesis enzyme, tyrosine  
695 hydroxylase (TH). Sections containing cortical and sub-cortical regions were stained for Nissl  
696 substance. Staining for TH was performed using a 1:4000 dilution of monoclonal mouse anti-TH  
697 antibody (ImmunoStar) and a 1:400 dilution of biotinylated, rat absorbed anti-mouse secondary  
698 antibody (Biozol) in PB. The antibody was visualized using a DAB and horse radish peroxidase  
699 reaction with hydrogen peroxide using a standard kit (Biozol, model: Vectastain Elite ABC-  
700 Peroxidase Kit CE). After staining for TH or Nissl, sections were mounted on gelatin-coated  
701 glass slides. Nissl stained and slide mounted sections were dehydrated in an alcohol series. Slides  
702 were cleared (Carl Roth, Roti-histol) and cover slipped with DPX slide mounting media (Sigma-  
703 Aldrich, catalog number: 06522).

#### 704 **Data analysis: Spike count correlations**

705 The Pearson's correlation coefficient was used to quantify the correlation between spike  
706 counts. Spontaneous spiking excluded the 1 sec period following foot shock stimulation or intra-  
707 cranial stimulation. Spontaneous spikes were also excluded during inactive periods in which the  
708 rate was less than 0.5 Hz due to quiescence of all single and multi-unit activity in the LC  
709 (paradoxical sleep<sup>2</sup>). Spontaneous spike count correlations were then calculated from the time  
710 bins (200 msec or 1000 msec) in which both neurons were active.



711 Poisson spike trains should generate some degree of synchrony (spike count correlation  
712 coefficient) by chance. We compared the correlation coefficient for each pair against 500  
713 surrogate spike trains for the same pair. The trains were generated in manner that preserved the  
714 inter-spike interval (ISI) distribution for each unit and the slow (<2 Hz) oscillations in spike rate  
715 (thought to be generated by brain network-wide interactions under anesthesia). Each surrogate  
716 spike train had the same oscillation phase preference, the same number of spikes per oscillation  
717 cycle, and an identical ISI distribution, but the precise spike timing of each unit in relation to  
718 other units is randomized.

719 Evoked spike count correlations after foot shocks were calculated from the trial-by-trial  
720 spike count in a single window after stimulus onset (50 msec). This window was chosen based  
721 upon the timing of the spiking evoked by a single pulse foot shock in our recordings, as well as  
722 reports by others<sup>16,49</sup>. For evoked correlations, the spiking on each trial was sparse in the 50  
723 msec window, so a statistical permutation test was under-powered and could not be performed.

#### 724 **Data analysis: Cross-correlograms**

725 We calculated cross-correlograms between spike trains. Significant changes in  
726 coincidental spike count were detected by comparing the observed counts to 1000 surrogate  
727 cross-correlograms generated from jitter spike times<sup>102</sup>. This approach uses the data to determine  
728 the degree of coincident spiking expected by chance and it also excludes synchrony due to  
729 interactions at slower time scales than those of interest. Briefly, the spike times for each unit  
730 were jittered on a uniform interval and a surrogate cross-correlogram was calculated between the  
731 jittered spike times; this process was repeated 1000 times. Significant cross-correlogram bins  
732 were those that crossed both a 1% pairwise expected spike count band and a 1% globally  
733 expected spike count band (the maximum and minimum counts at any time point in the cross-

734 correlogram and any surrogate cross-correlogram). For broad-type interactions, the cross-  
735 correlograms were calculated in a window of 2000 msec, a bin size of 10 msec, and a uniform  
736 jitter interval of  $\pm 200$  msec. Any significant coincidental spiking excludes synchrony due to co-  
737 variation of spiking on a timescale of a few hundred milliseconds. For sharp-type interactions,  
738 we used a window of 3 msec, a bin size of 0.05 msec, and a uniform jitter interval of  $\pm 1$  msec.

739 To ascertain if we missed interactions at other timescales, we employed the method of  
740 integrating the cross-correlogram<sup>36</sup>. The gradual integration of the cross-correlogram in  
741 successively larger windows (e.g.,  $\tau = \pm 5$  msec, 10 msec, ...40,000 msec) will result in a curve  
742 that changes rapidly during tau with a large concentration of coincidental spiking and will  
743 eventually plateau at very large tau at which the firing patterns of the pair is unrelated. We  
744 integrated in 1 msec steps from 0 to 40 sec and recorded the start of the plateau. The results of  
745 this analysis suggested that some interactions could occur on the level of a few seconds. Thus,  
746 we calculated additional cross-correlograms using a window of 20 sec, a bin size of 0.2 sec, and  
747 a uniform jitter on the interval of  $\pm 2$  sec.

#### 748 **Data analysis: Syn-fire chain analysis**

749 Repeating sequences of triplets of neuronal spiking were measured using three steps: (i) a  
750 spike-by-spike search, (ii) template-formation, and (iii) template matching algorithm<sup>103,104</sup>. The  
751 analysis stepped through all simultaneously recorded units  $n \rightarrow N$  and all of the spike times ( $M$ )  
752 for each unit ( $n_{m \rightarrow M}$ ). The spike search started with the first unit and its first spike,  $n_m$ . This  
753 spike time was a reference event marking the start of a 2 msec window during which we  
754 identified any other spiking units. The sequence of units and the delay between their spikes was  
755 stored as a template. For example,  $n_m$  might be followed 1.1 msec later by a spike from unit  $n =$   
756 5 which is subsequently followed 0.8 msec later by a spike from unit  $n = 30$ . This forms a

757 template of 1 – 5 – 30 with delays of 1.1 msec and 0.8 msec. The next step, template matching,  
758 would proceed through the spikes  $I_{m+1 \rightarrow M}$  and attempt to match the template and its delays. A 0.4  
759 msec window of error was allowed around each spike in the original template for matching.  
760 Thus, for each spike of unit  $n = 1$ , unit  $n = 5$  could spike between 0.7 msec and 1.5 msec after  
761 unit  $n = 1$  and unit  $n = 30$  could spike 0.4 msec to 1.2 msec after unit  $n = 5$ . A template match  
762 would be counted if the spikes of the other units aligned with the originally formed template. For  
763 each template, the total number of observations was compared to the number of observations in  
764 the top 1% of 100 surrogate data sets in which spike times were jittered on a uniform interval by  
765 1 msec. Any sequential spike patterns that occurred more often than expected by chance were  
766 counted as significantly occurring chains of spikes.

#### 767 **Data analysis: Graph theory analysis and ensemble detection**

768 For each rat, a graph was constructed with each unit as a node. Links were drawn  
769 between units with strong spike count correlations, following the methods of Rubinov & Sporns  
770 (2010) and Bruno et al. (2015)<sup>105,106</sup>. The threshold for drawing a link was set as the highest  
771 possible value such that the mean network degree was less than the  $\log(N)$ , where  $N$  is the  
772 number of nodes in the graph<sup>107</sup>. Units without strongly correlated activity were left unlinked.  
773 The resulting network was represented by a binary adjacency matrix. Ensembles were detected  
774 by segregating nodes into groups that maximize the number of links within each group and  
775 minimizes the number of links between group. The iterative optimization procedure used a  
776 Louvain community detection algorithm to maximize a modularity score ( $Q$ ) quantifying the  
777 degree to which groups separate<sup>106,108</sup>. The degree of ensemble separation ( $Q$ ) was compared to  
778 modularity scores from 1000 shuffled networks. If  $Q$  was higher than the top 5% of the  
779 1000 surrogate values, then adequate separation of units into ensembles was achieved. All graph

780 theory and ensemble detection analyses were implemented in MATLAB using the Brain  
781 Connectivity Toolbox <sup>109</sup>.

### 782 **Data analysis: Oscillations in spike count**

783         Single unit spike trains were first convolved with a Gaussian kernel with a width of 250  
784 msec and a sampling rate of 1 msec. The resulting spike density functions (SDF) were analyzed  
785 for the power of oscillations, the phase of oscillations, and the coherence between pairs of  
786 SDF's. The power spectral density of each spike train was calculated using a multi-taper method  
787 in MATLAB (Chronux Toolbox) <sup>110</sup>. We used 19 tapers with a time-bandwidth product of 10.  
788 The frequency band was 0.01 to 10 Hz. We used finite size correction for low spike counts.  
789 Instantaneous phase was extracted by first filtering the SDF with a 3<sup>rd</sup> order Butterworth filter at  
790 a particular frequency of interest (0.09 to 0.11 Hz and 0.40 to 0.48 Hz) and then obtaining phase  
791 from the Hilbert transform of the signal. The consistency of the instantaneous phase difference  
792 between each unit pair was assessed using Rayleigh's Test for Circular Uniformity ( $p < 0.05$ ),  
793 which was implemented in MATLAB (CircStat Toolbox) <sup>111</sup>. Coherence between pairs of units  
794 was calculated using the Chronux Toolbox in MATLAB with the same parameters used for  
795 calculating the power spectral density. Coherence and power were averaged across all single  
796 units and smoothed with a width of 0.15 Hz.

### 797 **Data analysis: Spike-LFP phase locking**

798         Local field potential (LFP) was recorded in the prefrontal cortex. The LFP was lowpass  
799 filtered with a 3<sup>rd</sup> order Butterworth filter at 2 Hz. The instantaneous phase was obtained by  
800 Hilbert transformation. Spike times corresponded to LFP phases. For each single unit, the phase  
801 distribution was tested for significant locking to cortical LFP using Rayleigh's Test for Circular  
802 Uniformity ( $p < 0.05$ ).

### 803 **Data analysis: Antidromic spiking**

804 Forebrain regions were stimulated in a randomized order with single pulses at currents of  
805 400, 600, 800, 1000, and 1200  $\mu$ A. Stimulation was delivered with a 2 sec inter-trial interval  
806 with 500 msec jitter. Peri-stimulus time histograms were Z-scored to 1 sec before stimulus onset.  
807 If a single bin (5 msec), but no other bins, exceeded a Z-score of 5, then the unit was marked as  
808 antidromically activated. The bin size was chosen, based on prior work, which has demonstrated  
809 that 3 or 4 msec of jitter occurs when stimulating LC fibers because they lack myelin<sup>112</sup>. This  
810 rationale is based on an extremely low chance of consistent spiking within the same 5 msec  
811 window by slowly firing neurons (typical ISI is longer than 100 msec). However, manual  
812 inspection of the individual spike rasters was used to confirm the results.

### 813 **Data analysis: statistics**

814 Data were tested for normality using a Shapiro-Wilk test ( $\alpha = 0.05$ ) and homogeneity  
815 of variance ( $\alpha = 0.05$ ) using an F-test (`vartest2` in MATLAB) for 2 groups or Levene's Test  
816 (`vartestn` in MATLAB) for more than 2 groups. If data were not normal, then a Wilcoxon-Mann-  
817 Whitney Test was used for 2 groups or a Kruskal-Wallis Test for more than 2 groups; otherwise,  
818 a two-sided t-test or between-subjects one-way ANOVA was used. If variance was  
819 inhomogeneous, then we used Welch's t-test or Welch's ANOVA. For ANOVA (or Kruskal-  
820 Wallis), post-hoc testing between individual groups was performed using the MATLAB  
821 function, `multcompare` (with Dunn-Sidak correction for Kruskal-Wallis). If a Welch's ANOVA  
822 was used for heteroscedastic data, then post-hoc testing was performed using the Games-Howell  
823 test. These comparisons were unplanned. Mean and standard error are reported for normally  
824 distributed data. Median and standard deviation are reported for data that were not normally  
825 distributed.

826 We report effect sizes as Cohen's D for analysis of 2 groups (e.g., t-test or Wilcoxon-Mann-  
827 Whitney) or, for analysis of more than 2 groups, we report  $\omega^2$  (e.g., ANOVA) or  $\omega^2_{adj}$  (e.g.,  
828 Welch's ANOVA). For 2 x 2 tables, we used a Fisher's Exact Test, for which the effect size is  
829 quantified by the Odds Ratio (OR), which we converted to Cohen's D (termed  $D_{or}$ )<sup>113</sup>.

$$D = \frac{\mu_1 - \mu_2}{S_p}, S_p = \sqrt{\frac{(n_1 - 1)\sigma_1^2 + (n_2 - 1)\sigma_2^2}{n_1 + n_2 - 2}}$$

$$D_{or} = \ln(OR) \times \frac{\sqrt{3}}{\pi}$$

$$\omega^2 = \frac{SS_{between\ groups} - (df_{between\ groups} \times Mean\ Squared\ Error)}{Mean\ Squared\ Error + SS_{total}}$$

$$\omega^2_{adj} = \frac{df_{between\ groups} \times (F - 1)}{df_{between\ groups} \times (F - 1) + N}, N = \text{number of samples}$$

830 In the case that a null hypothesis was rejected, we made a post-hoc determination that the  
831 sample size and statistical test provided adequate power to reject the null hypothesis. The power  
832 was calculated with `sampsizepw` in MATLAB for 2 groups. If there were more than 3 groups,  
833 then the power was calculated using `powerAOVI` in MATLAB. We are unaware of methods for  
834 assessing the power of a Kruskal-Wallis Test or a Welch's ANOVA and do not report power for  
835 those tests.

836 For circular data, uniformity was assessed using Rayleigh's Test for Circular Uniformity  
837 ( $\alpha = 0.05$ ). These calculations were made using the `CircStat` toolbox in MATLAB<sup>111</sup>. Power  
838 calculations were not made for circular statistics.

### 839 **Data availability statement**

840 The generated datasets for this study are available from the corresponding author on  
841 reasonable request.

842 **Code availability**

843 The code used for data analysis are available from the corresponding author.

## References and Notes:

1. Smeets, W. J. & González, A. Catecholamine systems in the brain of vertebrates: new perspectives through a comparative approach. *Brain Res. Brain Res. Rev.* **33**, 308–379 (2000).
2. Aston-Jones, G. & Bloom, F. E. Activity of norepinephrine-containing locus coeruleus neurons in behaving rats anticipates fluctuations in the sleep-waking cycle. *J. Neurosci.* **1**, 876–886 (1981).
3. Berridge, C. W. & Waterhouse, B. D. The locus coeruleus-noradrenergic system: modulation of behavioral state and state-dependent cognitive processes. *Brain Res. Brain Res. Rev.* **42**, 33–84 (2003).
4. Sara, S. J. & Bouret, S. Orienting and reorienting: the locus coeruleus mediates cognition through arousal. *Neuron* **76**, 130–141 (2012).
5. Aston-Jones, G. & Cohen, J. D. An integrative theory of locus coeruleus-norepinephrine function: adaptive gain and optimal performance. *Annu. Rev. Neurosci.* **28**, 403–450 (2005).
6. Aston-Jones, G., Ennis, M., Pieribone, V. A., Nickell, W. T. & Shipley, M. T. The brain nucleus locus coeruleus: restricted afferent control of a broad efferent network. *Science* **234**, 734–737 (1986).
7. Haider, B. & McCormick, D. A. Rapid neocortical dynamics: cellular and network mechanisms. *Neuron* **62**, 171–189 (2009).
8. Eldar, E., Cohen, J. D. & Niv, Y. The effects of neural gain on attention and learning. *Nat Neurosci* **16**, 1146–1153 (2013).
9. Lee, S.-H. & Dan, Y. Neuromodulation of brain states. *Neuron* **76**, 209–222 (2012).
10. Dayan, P. & Yu, A. J. Phasic norepinephrine: a neural interrupt signal for unexpected events. *Network* **17**, 335–350 (2006).
11. Mundorf, M. L., Joseph, J. D., Austin, C. M., Caron, M. G. & Wightman, R. M. Catecholamine release and uptake in the mouse prefrontal cortex. *J. Neurochem.* **79**, 130–142 (2008).
12. Schwarz, L. A. *et al.* Viral-genetic tracing of the input-output organization of a central noradrenaline circuit. *Nature* (2015). doi:10.1038/nature14600
13. Mitchell, K., Oke, A. F. & Adams, R. N. In vivo dynamics of norepinephrine release-reuptake in multiple terminal field regions of rat brain. *J. Neurochem.* **63**, 917–926 (1994).
14. Room, P., Postema, F. & Korf, J. Divergent axon collaterals of rat locus coeruleus neurons: demonstration by a fluorescent double labeling technique. *Brain Research* **221**, 219–230 (1981).
15. Ishimatsu, M. & Williams, J. T. Synchronous activity in locus coeruleus results from dendritic interactions in pericoerulear regions. *J. Neurosci.* **16**, 5196–5204 (1996).
16. Aston-Jones, G. & Bloom, F. E. Norepinephrine-containing locus coeruleus neurons in behaving rats exhibit pronounced responses to non-noxious environmental stimuli. *J. Neurosci.* **1**, 887–900 (1981).
17. Alvarez, V. A., Chow, C. C., Van Bockstaele, E. J. & Williams, J. T. Frequency-dependent synchrony in locus coeruleus: role of electrotonic coupling. *Proc. Natl. Acad. Sci. U.S.A.* **99**, 4032–4036 (2002).
18. Ennis, M. & Aston-Jones, G. Activation of locus coeruleus from nucleus



- paragigantocellularis: a new excitatory amino acid pathway in brain. *J. Neurosci.* **8**, 3644–3657 (1988).
19. Noudoost, B. & Moore, T. The role of neuromodulators in selective attention. *Trends in Cognitive Sciences* 1–7 (2011). doi:10.1016/j.tics.2011.10.006
  20. Robbins, T. W. Arousal systems and attentional processes. *Biological Psychology* **45**, 57–71 (1997).
  21. Sara, S. J. The locus coeruleus and noradrenergic modulation of cognition. *Nat Rev Neurosci* **10**, 211–223 (2009).
  22. Harris, K. D. & Thiele, A. Cortical state and attention. *Nat Rev Neurosci* **12**, 509–523 (2011).
  23. Eban-Rothschild, A., Rothschild, G., Giardino, W. J., Jones, J. R. & de Lecea, L. VTA dopaminergic neurons regulate ethologically relevant sleep–wake behaviors. *Nat Neurosci* **19**, 1356–1366 (2016).
  24. Kim, Y., Wood, J. & Moghaddam, B. Coordinated activity of ventral tegmental neurons adapts to appetitive and aversive learning. *PLoS ONE* **7**, e29766 (2012).
  25. Eshel, N., Tian, J., Bukwich, M. & Uchida, N. Dopamine neurons share common response function for reward prediction error. *Nat Neurosci* **19**, 479–486 (2016).
  26. Joshua, M. *et al.* Synchronization of Midbrain Dopaminergic Neurons Is Enhanced by Rewarding Events. *Neuron* **62**, 695–704 (2009).
  27. Tian, J. *et al.* Distributed and Mixed Information in Monosynaptic Inputs to Dopamine Neurons. *Neuron* **91**, 1374–1389 (2016).
  28. Schultz, W., Stauffer, W. R. & Lak, A. The phasic dopamine signal maturing: from reward via behavioural activation to formal economic utility. *Current Opinion in Neurobiology* **43**, 139–148 (2017).
  29. Kebschull, J. M. *et al.* High-Throughput Mapping of Single-Neuron Projections by Sequencing of Barcoded RNA. *Neuron* **91**, 975–987 (2016).
  30. Chandler, D. J., Gao, W.-J. & Waterhouse, B. D. Heterogeneous organization of the locus coeruleus projections to prefrontal and motor cortices. *Proceedings of the National Academy of Sciences* **111**, 6816–6821 (2014).
  31. Watabe, K. *Mode of neuronal interaction in rat locus coeruleus*. (Archives italiennes de biologie, 1980).
  32. Usher, M., Cohen, J. D., Servan-Schreiber, D., Rajkowski, J. & Aston-Jones, G. The role of locus coeruleus in the regulation of cognitive performance. *Science* **283**, 549–554 (1999).
  33. Runyan, C. A., Piasini, E., Panzeri, S. & Harvey, C. D. Distinct timescales of population coding across cortex. *Nature* **548**, 92–96 (2017).
  34. Cohen, M. R. & Kohn, A. Measuring and interpreting neuronal correlations. *Nature Publishing Group* **14**, 811–819 (2011).
  35. Engel, A. K., König, P., Gray, C. M. & Singer, W. Stimulus-Dependent Neuronal Oscillations in Cat Visual Cortex: Inter-Columnar Interaction as Determined by Cross-Correlation Analysis. *Eur. J. Neurosci.* **2**, 588–606 (1990).
  36. Bair, W., Zohary, E. & Newsome, W. T. Correlated firing in macaque visual area MT: time scales and relationship to behavior. *Journal of Neuroscience* **21**, 1676–1697 (2001).
  37. Eschenko, O., Magri, C., Panzeri, S. & Sara, S. J. Noradrenergic Neurons of the Locus Coeruleus Are Phase Locked to Cortical Up-Down States during Sleep. *Cerebral Cortex* (2011). doi:10.1093/cercor/bhr121

38. Safaai, H., Neves, R., Eschenko, O., Logothetis, N. K. & Panzeri, S. Modeling the effect of locus coeruleus firing on cortical state dynamics and single-trial sensory processing. *Proceedings of the National Academy of Sciences* **112**, 12834–12839 (2015).
39. Aasebø, I. E. J. *et al.* Temporal Processing in the Visual Cortex of the Awake and Anesthetized Rat. *eneuro* **4**, ENEURO.0059–17.2017 (2017).
40. Sakata, S. & Harris, K. D. Laminar structure of spontaneous and sensory-evoked population activity in auditory cortex. *Neuron* **64**, 404–418 (2009).
41. Ecker, A. S. *et al.* State dependence of noise correlations in macaque primary visual cortex. *Neuron* **82**, 235–248 (2014).
42. Erchova, I. A., Lebedev, M. A. & Diamond, M. E. Somatosensory cortical neuronal population activity across states of anaesthesia. *Eur. J. Neurosci.* **15**, 744–752 (2002).
43. Brody, C. D. Correlations Without Synchrony. *Neural Comput* **11**, 1537–1551 (1999).
44. la Rocha, de, J., Doiron, B., Shea-Brown, E., Josić, K. & Reyes, A. D. Correlation between neural spike trains increases with firing rate. *Nature* **448**, 802–806 (2007).
45. Takeuchi, T. *et al.* Locus coeruleus and dopaminergic consolidation of everyday memory. *Nature* **537**, 357–362 (2016).
46. Vankov, A., Hervé-Minvielle, A. & Sara, S. J. Response to novelty and its rapid habituation in locus coeruleus neurons of the freely exploring rat. *Eur. J. Neurosci.* **7**, 1180–1187 (1995).
47. Bari, A. & Aston-Jones, G. Atomoxetine modulates spontaneous and sensory-evoked discharge of locus coeruleus noradrenergic neurons. *Neuropharmacology* (2012). doi:10.1016/j.neuropharm.2012.07.020
48. Bouret, S. & Sara, S. J. Reward expectation, orientation of attention and locus coeruleus-medial frontal cortex interplay during learning. *European Journal of Neuroscience* **20**, 791–802 (2004).
49. Foote, S. L., Aston-Jones, G. & Bloom, F. E. Impulse activity of locus coeruleus neurons in awake rats and monkeys is a function of sensory stimulation and arousal. *Proc. Natl. Acad. Sci. U.S.A.* **77**, 3033–3037 (1980).
50. Kalwani, R. M., Joshi, S. & Gold, J. I. Phasic activation of individual neurons in the locus coeruleus/subcoeruleus complex of monkeys reflects rewarded decisions to go but not stop. *Journal of Neuroscience* **34**, 13656–13669 (2014).
51. Ennis, M. & Aston-Jones, G. Evidence for self- and neighbor-mediated postactivation inhibition of locus coeruleus neurons. *Brain Research* **374**, 299–305 (1986).
52. Lee, A., Rosin, D. L. & Van Bockstaele, E. J. alpha2A-adrenergic receptors in the rat nucleus locus coeruleus: subcellular localization in catecholaminergic dendrites, astrocytes, and presynaptic axon terminals. *Brain Research* **795**, 157–169 (1998).
53. Aghajanian, G. K., Cedarbaum, J. M. & Wang, R. Y. Evidence for norepinephrine-mediated collateral inhibition of locus coeruleus neurons. *Brain Research* **136**, 570–577 (1977).
54. Huang, H.-P. *et al.* Long latency of evoked quantal transmitter release from somata of locus coeruleus neurons in rat pontine slices. *Proceedings of the National Academy of Sciences* **104**, 1401–1406 (2007).
55. Kohn, A. & Smith, M. A. Stimulus dependence of neuronal correlation in primary visual cortex of the macaque. *Journal of Neuroscience* **25**, 3661–3673 (2005).
56. Moore, G. P., Segundo, J. P., Perkel, D. H. & Levitan, H. Statistical Signs of Synaptic Interaction in Neurons. *Biophys. J.* **10**, 876–900 (1970).

57. Perkel, D. H., Gerstein, G. L. & Moore, G. P. Neuronal Spike Trains and Stochastic Point Processes. *Biophys. J.* **7**, 419–440 (1967).
58. Trenholm, S. *et al.* Nonlinear dendritic integration of electrical and chemical synaptic inputs drives fine-scale correlations. *Nat Neurosci* **17**, 1759–1766 (2014).
59. van Welie, I., Roth, A., Ho, S. S. N., Komai, S. & Häusser, M. Conditional Spike Transmission Mediated by Electrical Coupling Ensures Millisecond Precision-Correlated Activity among Interneurons In Vivo. *Neuron* **90**, 810–823 (2016).
60. Connors, B. W., Gibson, J. R. & Beierlein, M. Two networks of electrically coupled inhibitory neurons in neocortex. *Nature* **402**, 75–79 (1999).
61. Smith, M. A. & Kohn, A. Spatial and temporal scales of neuronal correlation in primary visual cortex. *Journal of Neuroscience* **28**, 12591–12603 (2008).
62. Smith, M. A. & Sommer, M. A. Spatial and Temporal Scales of Neuronal Correlation in Visual Area V4. *J. Neurosci.* **33**, 5422–5432 (2013).
63. Aston-Jones, G. *et al.* Afferent regulation of locus coeruleus neurons: anatomy, physiology and pharmacology. *Prog. Brain Res.* **88**, 47–75 (1991).
64. Clement, E. A. *et al.* Cyclic and Sleep-Like Spontaneous Alternations of Brain State Under Urethane Anaesthesia. *PLoS ONE* **3**, e2004 (2008).
65. Petersen, C. C. H., Hahn, T. T. G., Mehta, M., Grinvald, A. & Sakmann, B. Interaction of sensory responses with spontaneous depolarization in layer 2/3 barrel cortex. *Proc. Natl. Acad. Sci. U.S.A.* **100**, 13638–13643 (2003).
66. Sakata, S. & Harris, K. D. Laminar-dependent effects of cortical state on auditory cortical spontaneous activity. *Front. Neural Circuits* **6**, 109 (2012).
67. Leopold, D. A., Murayama, Y. & Logothetis, N. K. Very slow activity fluctuations in monkey visual cortex: implications for functional brain imaging. *Cereb. Cortex* **13**, 422–433 (2003).
68. Chan, A. W., LeDue, J. M., Mohajerani, M. H., Wang, Y. T. & Murphy, T. H. Mesoscale infraslow spontaneous membrane potential fluctuations recapitulate high-frequency activity cortical motifs. *Nat Commun* **6**, 7738 (2015).
69. Lakatos, P. An Oscillatory Hierarchy Controlling Neuronal Excitability and Stimulus Processing in the Auditory Cortex. *Journal of Neurophysiology* **94**, 1904–1911 (2005).
70. Steriade, M., Nuñez, A. & Amzica, F. A novel slow (< 1 Hz) oscillation of neocortical neurons in vivo: depolarizing and hyperpolarizing components. *J. Neurosci.* **13**, 3252–3265 (1993).
71. Lestienne, R., Hervé-Minvielle, A., Robinson, D., Briois, L. & Sara, S. J. Slow oscillations as a probe of the dynamics of the locus coeruleus-frontal cortex interaction in anesthetized rats. *J. Physiol. Paris* **91**, 273–284 (1997).
72. Okun, M. *et al.* Diverse coupling of neurons to populations in sensory cortex. *Nature* **521**, 511–515 (2015).
73. Nakamura, S. & Iwama, K. Antidromic activation of the rat locus coeruleus neurons from hippocampus, cerebral and cerebellar cortices. *Brain Research* **99**, 372–376 (1975).
74. Jodo, E., Chiang, C. & Aston-Jones, G. Potent excitatory influence of prefrontal cortex activity on noradrenergic locus coeruleus neurons. *Neuroscience* **83**, 63–79 (1998).
75. Nakamura, S. Some electrophysiological properties of neurones of rat locus coeruleus. *The Journal of Physiology* **267**, 641–658 (1977).
76. Chauvette, S. Properties of slow oscillation during slow-wave sleep and anesthesia in cats. *Journal of Neuroscience* **31**, 14998–15008 (2011).

77. Sellers, K. K., Bennett, D. V., Hutt, A. & Fröhlich, F. Anesthesia differentially modulates spontaneous network dynamics by cortical area and layer. *Journal of Neurophysiology* **110**, 2739–2751 (2013).
78. Uematsu, A. *et al.* Modular organization of the brainstem noradrenaline system coordinates opposing learning states. *Nat Neurosci* **63**, 844 (2017).
79. Schumacher, J. W., Schneider, D. M. & Woolley, S. M. N. Anesthetic state modulates excitability but not spectral tuning or neural discrimination in single auditory midbrain neurons. *Journal of Neurophysiology* **106**, 500–514 (2011).
80. Sceniak, M. P., Sceniak, M. P., Maciver, M. B. & Maciver, M. B. Cellular actions of urethane on rat visual cortical neurons in vitro. *Journal of Neurophysiology* **95**, 3865–3874 (2006).
81. Daló, N. L. & Hackman, J. C. The anesthetic urethane blocks excitatory amino acid responses but not GABA responses in isolated frog spinal cords. *Journal of Anesthesia* **27**, 98–103 (2012).
82. Connors, B. W. Synchrony and so much more: Diverse roles for electrical synapses in neural circuits. *Devel Neurobio* **77**, 610–624 (2017).
83. Szabadi, E. Functional neuroanatomy of the central noradrenergic system. *J. Psychopharmacol. (Oxford)* **27**, 659–693 (2013).
84. Ennis, M. & Aston-Jones, G. A potent excitatory input to the nucleus locus coeruleus from the ventrolateral medulla. *Neuroscience Letters* **71**, 299–305 (1986).
85. Ennis, M. & Aston-Jones, G. GABA-mediated inhibition of locus coeruleus from the dorsomedial rostral medulla. *J. Neurosci.* **9**, 2973–2981 (1989).
86. Marzo, A., Totah, N. K., Neves, R. M., Logothetis, N. K. & Eschenko, O. Unilateral electrical stimulation of rat locus coeruleus elicits bilateral response of norepinephrine neurons and sustained activation of medial prefrontal cortex. *Journal of Neurophysiology* **111**, 2570–2588 (2014).
87. Hirata, H. & Aston-Jones, G. A novel long-latency response of locus coeruleus neurons to noxious stimuli: mediation by peripheral C-fibers. *Journal of Neurophysiology* **71**, 1752–1761 (1994).
88. The anatomical and functional relationship between the P3 and autonomic components of the orienting response. *Psychophysiology* **48**, 162–175 (2010).
89. Pfaff, D. W., Martin, E. M. & Faber, D. Origins of arousal: roles for medullary reticular neurons. *Trends in Neurosciences* **35**, 468–476 (2012).
90. Tamietto, M. & de Gelder, B. Neural bases of the non-conscious perception of emotional signals. *Nat Rev Neurosci* **11**, 697–709 (2010).
91. Vanhatalo, S. *et al.* Infraslow oscillations modulate excitability and interictal epileptic activity in the human cortex during sleep. *Proc. Natl. Acad. Sci. U.S.A.* **101**, 5053–5057 (2004).
92. Buzsáki, G. & Draguhn, A. Neuronal oscillations in cortical networks. *Science* **304**, 1926–1929 (2004).
93. Finding coherence in spontaneous oscillations. **11**, 991–993 (2008).
94. Mittner, M., Hawkins, G. E., Boekel, W. & Forstmann, B. U. A Neural Model of Mind Wandering. *Trends in Cognitive Sciences* **20**, 570–578 (2016).
95. Aston-Jones, G., Segal, M. & Bloom, F. E. Brain aminergic axons exhibit marked variability in conduction velocity. *Brain Research* **195**, 215–222 (1980).
96. Loughlin, S. E., Foote, S. L. & Grzanna, R. Efferent projections of nucleus locus

- coeruleus: morphologic subpopulations have different efferent targets. *Neuroscience* **18**, 307–319 (1986).
97. Grzanna, R. & Molliver, M. E. The locus coeruleus in the rat: An immunohistochemical delineation. *Neuroscience* **5**, 21–40 (1980).
  98. Quiroga, R. Q., Nadasdy, Z. & Ben-Shaul, Y. Unsupervised spike detection and sorting with wavelets and superparamagnetic clustering. *Neural Comput* **16**, 1661–1687 (2004).
  99. Sara, S. J. & Segal, M. Plasticity of sensory responses of locus coeruleus neurons in the behaving rat: implications for cognition. *Prog. Brain Res.* (1991).
  100. Henze, D. A. *et al.* Intracellular features predicted by extracellular recordings in the hippocampus in vivo. *Journal of Neurophysiology* **84**, 390–400 (2000).
  101. Erisken, S. *et al.* Effects of locomotion extend throughout the mouse early visual system. *Curr. Biol.* **24**, 2899–2907 (2014).
  102. Fujisawa, S., Amarasingham, A., Harrison, M. T. & Buzsáki, G. Behavior-dependent short-term assembly dynamics in the medial prefrontal cortex. *Nat Neurosci* **11**, 823–833 (2008).
  103. Luongo, F. J., Zimmerman, C. A., Horn, M. E. & Sohal, V. S. Correlations between prefrontal neurons form a small-world network that optimizes the generation of multineuron sequences of activity. *Journal of Neurophysiology* **115**, 2359–2375 (2016).
  104. Ikegaya, Y. *et al.* Synfire chains and cortical songs: temporal modules of cortical activity. *Science* **304**, 559–564 (2004).
  105. Bruno, A. M., Frost, W. N. & Humphries, M. D. Modular deconstruction reveals the dynamical and physical building blocks of a locomotion motor program. *Neuron* **86**, 304–318 (2015).
  106. Rubinov, M. & Sporns, O. Complex network measures of brain connectivity: uses and interpretations. *NeuroImage* **52**, 1059–1069 (2010).
  107. Watts, D. J. & Strogatz, S. H. Collective dynamics of ‘small-world’ networks. *Nature* **393**, 440–442 (1998).
  108. Blondel, V. D., Guillaume, J.-L., Lambiotte, R. & Lefebvre, E. Fast unfolding of communities in large networks. *Journal of statistical ...* **2008**, P10008 (2008).
  109. Bullmore, E. & Sporns, O. Complex brain networks: graph theoretical analysis of structural and functional systems. *Nat Rev Neurosci* **10**, 186–198 (2009).
  110. Mitra, P. & Bokil, H. *Observed Brain Dynamics*. (Oxford University Press, 2007). doi:10.1093/acprof:oso/9780195178081.001.0001
  111. Berens, P. CircStat: a MATLAB toolbox for circular statistics. *Journal of Statistical Software* (2009).
  112. Aston-Jones, G., Foote, S. L. & Segal, M. Impulse conduction properties of noradrenergic locus coeruleus axons projecting to monkey cerebrocortex. *Neuroscience* **15**, 765–777 (1985).
  113. Sánchez-Meca, J., Marín-Martínez, F. & Chacón-Moscoso, S. Effect-Size Indices for Dichotomized Outcomes in Meta-Analysis. *Psychological Methods* **8**, 448–467 (2003).
  114. Simpson, K. L. *et al.* Lateralization and functional organization of the locus coeruleus projection to the trigeminal somatosensory pathway in rat. *J. Comp. Neurol.* **385**, 135–147 (1997).
  115. Morrison, J. H., Molliver, M. E. & Grzanna, R. Noradrenergic innervation of cerebral cortex: widespread effects of local cortical lesions. *Science* **205**, 313–316 (1979).

**Acknowledgments:** We thank Axel Oeltermann and Eduard Krampe for technical assistance with stimulating electrodes, Joachim Werner for technical support, Dr. Henry Evrard for expertise in immunohistochemistry, Marcel Hertl, Felicitas Horn, Jennifer Smuda, and Katalin Kalya for assistance with histology, and Valeria d'Andrea for helping to write the code for the permutation statistical test. We thank Dr. Susan Sara for comments on the paper. This research was supported by the European Union's Marie Curie Fellowship in the FP7 funding scheme to N.K.T. (PIIF-GA-2012-331122) and the European Union's FET Open in the FP7 funding scheme (SICODE) to S.P., O.E., and N.K.L. All data are archived for 10 years or longer at the Max Planck Institute for Biological Cybernetics. The author contributions are as follows: N.K.T., N.K.L., O.E. - conceived of the project; N.K.T., O.E. – experimental design; N.K.T., S.P., N.K.L., O.E. – analysis design; N.K.T., R.N. - collected data; N.K.T. - analyzed data; N.K.T., O.E. - wrote the paper; all authors - edited the paper.

| <b>Rat Identifier</b> | <b>Number of single units</b> | <b>Number (%) of narrow type</b> | <b>Number (%) of wide type</b> |
|-----------------------|-------------------------------|----------------------------------|--------------------------------|
| 959.1                 | 7                             | 5 (71)                           | 2 (29)                         |
| 980.4                 | 9                             | 9 (100)                          | 0 (0)                          |
| 105.1                 | 5                             | 0 (0)                            | 5 (100)                        |
| 105.2                 | 52                            | 10 (19)                          | 42 (81)                        |
| 109.1                 | 21                            | 0 (0)                            | 21 (100)                       |
| 134.2                 | 15                            | 0 (0)                            | 15 (100)                       |
| 259.1                 | 18                            | 0 (0)                            | 18 (100)                       |
| 259.2                 | 27                            | 4 (15)                           | 23 (85)                        |
| 263.2                 | 36                            | 2 (6)                            | 34 (94)                        |
| 286.3                 | 8                             | 3 (38)                           | 5 (62)                         |
| 288.1                 | 6                             | 0 (0)                            | 6 (100)                        |
| 288.2                 | 30                            | 1 (3.3)                          | 29 (96.7)                      |

**Table 1. The number of LC single units recorded in each rat.** The numbers (and percent) of each unit type are listed. Both unit types were often recorded simultaneously, but narrow units were recorded in 7 out of 12 rats, possibly because of fewer units with narrow waveform reducing their probability of detection.

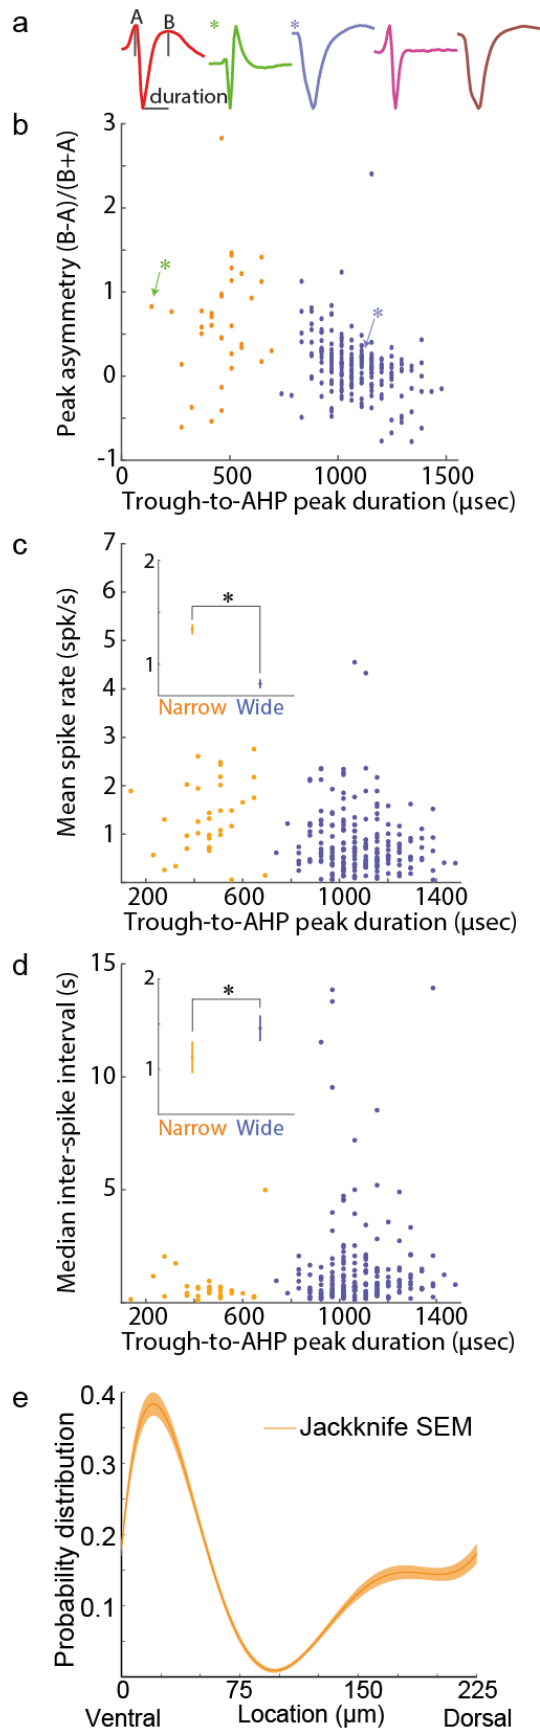



**Figure 1. Distinct populations of LC single units were separable by waveform shape, spike**

**rate, and responsiveness to prefrontal cortex stimulation. (A)** The average waveforms of 5 example units illustrate the diversity of waveform shapes in the LC. **(B)** Units were separable based on the waveform duration and the amplitude of the after-hyperpolarization in relation to the first peak. The green and blue asterisks refer to the example waveforms in panel A with the same markings. **(C, D)** Scatter plots with the mean spontaneous spike rate and inter-spike interval for each isolated LC unit. The insets on C and D show the mean and standard error for each unit type. N = 34 (narrow) and 200 (wide) units. **(E)** Narrow type units were predominantly distributed in the ventral aspect of the nucleus and sparsely recorded elsewhere in the nucleus. The mean and standard error of the probability distribution function is plotted.

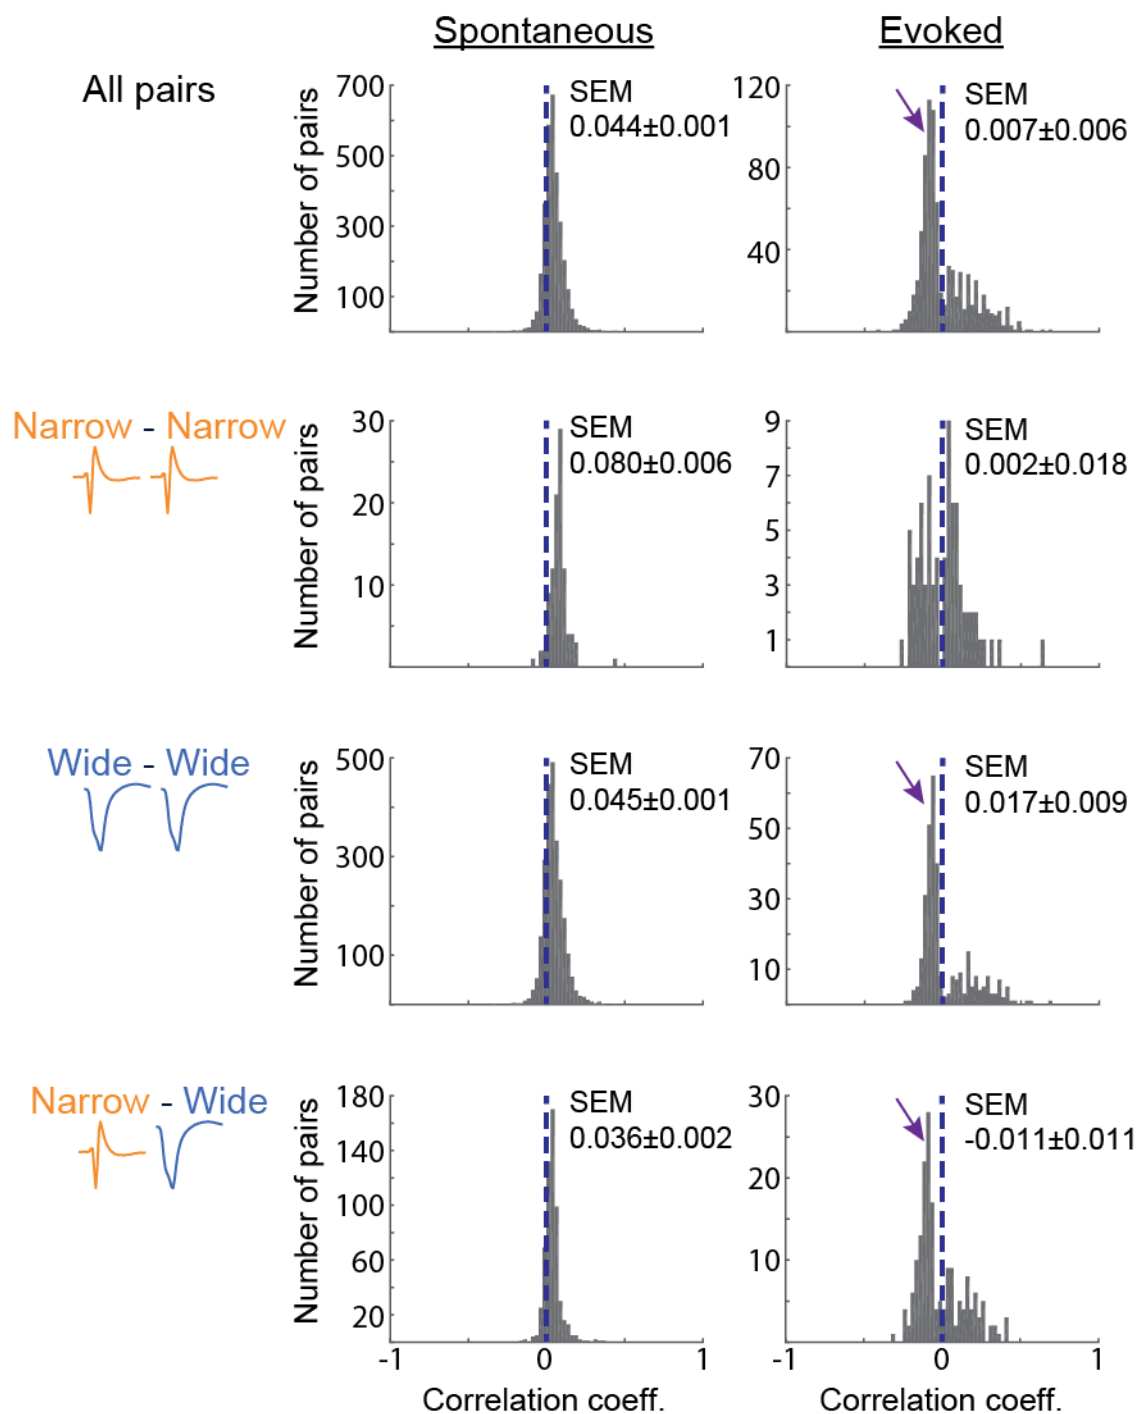

**Figure 2. Pairwise spike count correlations are near zero and anti-correlations are cell type specific.** The distribution of spike count correlation coefficients is around zero (dotted blue line) during spontaneous spiking (left panel) or following single pulse foot shock stimulation (right

panel). Spike count correlations are plotted separately for pairs of narrow units, pairs of wide units, and pairs of mixed unit type according to the labels on the left of the histograms.  $N = 100$  (both narrow type units), 2480 (both wide type units), and 584 (mixed unit type) pairs. Prominent negative correlations are apparent after evoked foot shocks (arrows, right panel). These negative correlations only occur in pairs containing a wide unit.

A

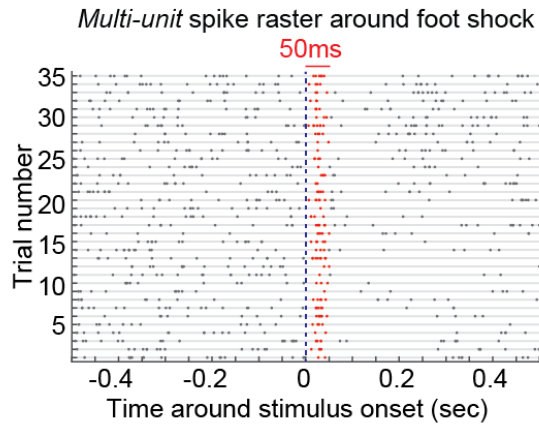

B

*Single unit trial-averaged spike rate averaged across units*

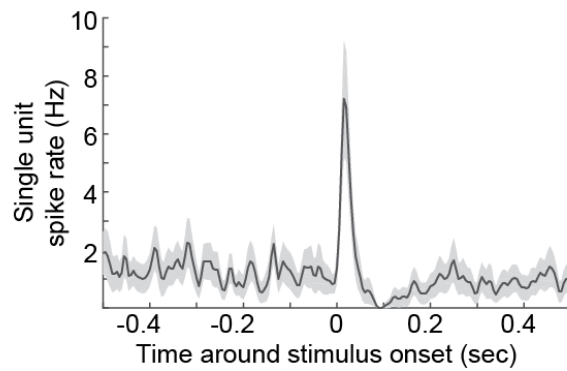

C

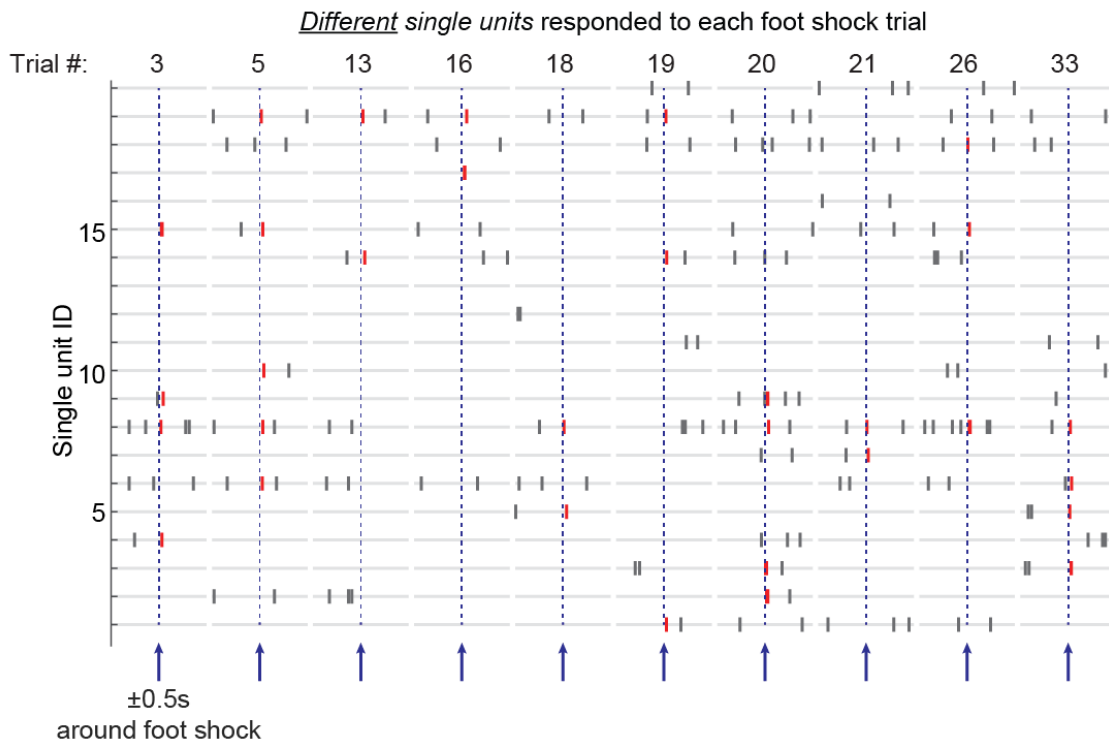

**Figure 3.** The response to single pulse foot shock engaged different LC units on each trial. The figure shows an example recording of 20 units. **A.** The spike raster (trials are rows) after all simultaneously recorded single unit spike trains were merged into a single multi-unit spike train per rat. The red ticks indicate spiking during the first 50 msec after stimulation (i.e., the population phasic burst of spikes). The phasic response is followed by noradrenergic-mediated auto-inhibition. The plot depicts 20 units from one rat. **B.** The trial-averaged peri-stimulus spike rate histograms for single units were averaged. The plot is the mean and standard error of across single units ( $N = 20$  single units, same as in A, and bin size of 5 msec). This plot shows that single units, on average across trials, exhibit a phasic burst followed by inhibition. **C.** The spike raster of the same 20 units (y-axis) is plotted for 500 msec before and 500 msec after foot shock (arrows) on 10 randomly selected trials. The spikes of each single unit that occur during the 50 msec window that encompasses the LC phasic burst (in A and B) are colored in red. At the level of single trials, different single units responded on different trials. For example, unit 15 responded during the 50 msec after foot shock only on trials 3, 5, and 26; whereas unit 14 responded on trials 13 and 19. This randomness reduces the trial-by-trial evoked spike count correlation coefficients (see Figure 2).

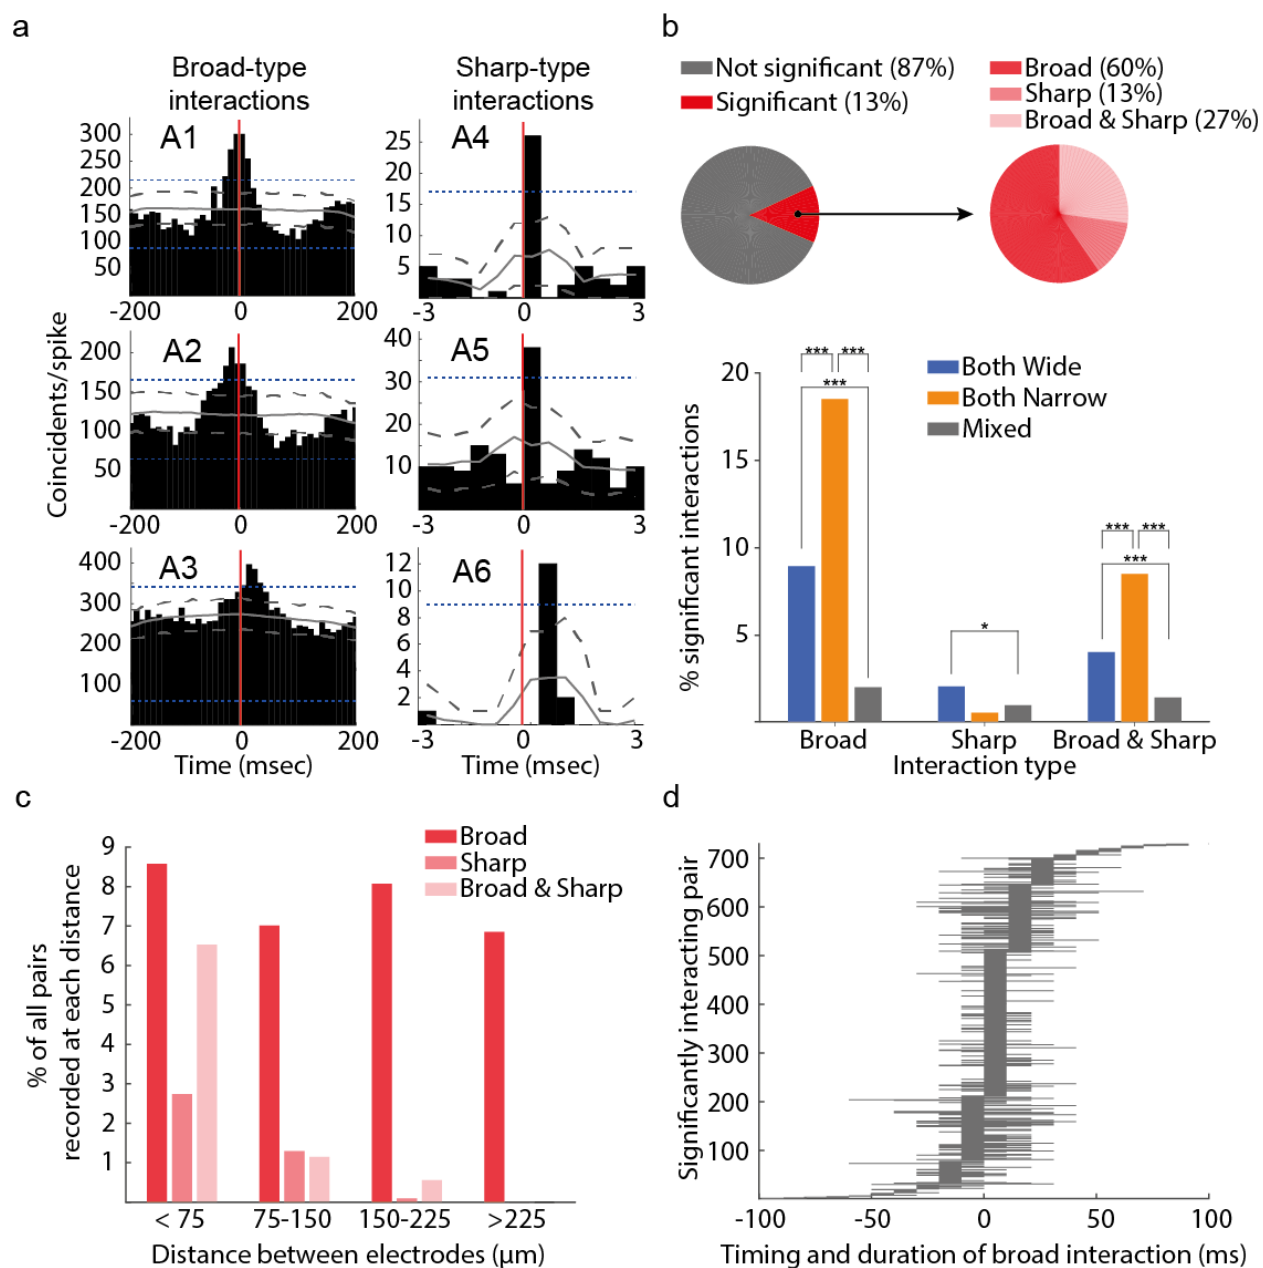

**Figure 4. Spike train cross-correlograms indicated that interactions were rare.** (A) Three example cross-correlograms with significant coincidental spiking on the timescale of broad-type interactions (A1-A3) and sharp-type interactions (A4-A6). Broad-type interactions lasted for tens of milliseconds, whereas sharp-type interactions were extremely brief (less than 1 millisecond). An interaction was counted if a significant number of coincidental spikes crossed both a pairwise 1% threshold (dotted grey lines) and a 1% global threshold (dotted blue lines) obtained from a

surrogate data set of 1000 cross-correlograms computed from jittered spike times. The mean of the 1000 surrogate cross-correlograms is a solid grey line. **(B)** A minority of cross-correlograms (13%) had a significant number of coincidental spikes in at least one bin. A larger percent of the pairs of narrow units had significant broad-type interactions in comparison to pairs of wide units or pairs of both unit types. **(C)** The percent of pairs with broad-type interactions was similar regardless of the distance between the units in the pair. On the other hand, sharp-type interactions occurred only between spatially confined units. **(D)** Out of the pairs with significant broad-type interactions, the timing of the interaction peak and the duration (continuous bins above the significance threshold) is plotted for each pair. These interactions occurred over a broad time range. Peaks were not exclusively centered at time 0 with a symmetrically spread around time 0 (as in panel A1).

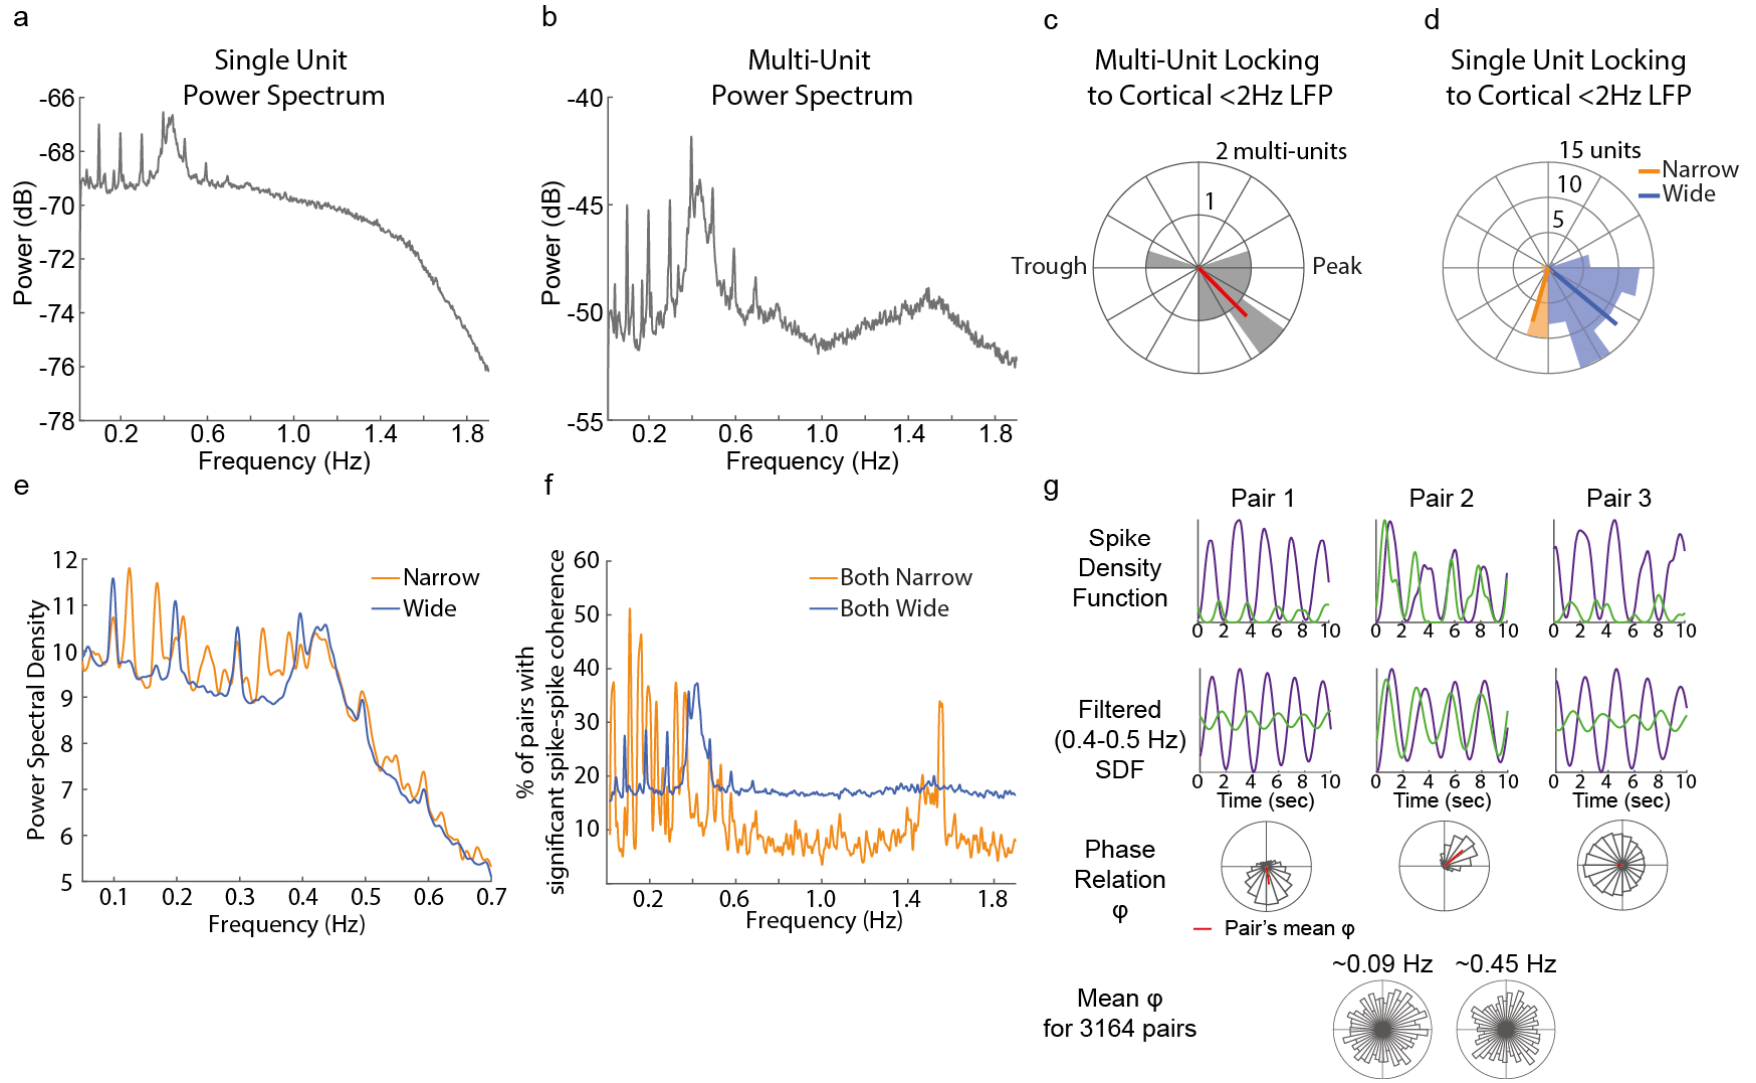

**Figure 5. Spike rates oscillated asynchronously across individual LC units and different cell types responded at distinct phases of cortical slow oscillations. (A)** Single unit spike trains were converted to spike density functions (SDF) and their power spectra



were calculated. The plot shows the mean power spectrum across all single units. Two oscillatory regimes at 0.09 Hz and between 0.4 and 0.5 Hz were observed in single unit spike trains. **(B)** Merging simultaneously recorded single unit spike trains into one multi-unit spike train before constructing a SDF revealed spectral power at the infra-slow frequencies (0.09 Hz and 0.4-0.5 Hz), as well as at around 1 – 2 Hz. **(C)** Multi-unit spiking was phase locked to the trough-to-peak transition reflected by the phase of cortical delta oscillations. The polar plot is a histogram of the number of multi-units at each bin of cortical LFP phase. The red line is the mean across multi-units. **(D)** Single units were also phase locked to the cortical delta oscillation, in spite of not rhythmically spiking at that frequency (A). Narrow units responded significantly earlier than wide units during the cortical delta oscillation. The wide units preferentially fired at 320 degrees, whereas the mean angle for narrow units was 254 degrees (the trough, or down state, was 180 degrees and the zero-crossing between the trough and the peak was at 270 deg). **(E)** Wide and narrow units both oscillated at infra-slow frequencies (0.09 Hz and 0.4-0.5 Hz), but narrow unit spike trains had additional peaks of spectral power between 0.1 and 0.2 Hz. **(F)** The spike counts of narrow and wide units fluctuated coherently at a range of infra-slow and slow frequencies. The percent of pairs with significant spike-spike coherence is plotted for pairs of narrow units and pairs of wide units. Pairs of wide units oscillated together at 0.09 Hz and 0.4-0.5 Hz. Pairs of narrow units oscillated together at different infra-slow frequencies and at approximately 1.5 Hz. **(G)** The spike rates of 3 example pairs over a 10 sec period are plotted as spike density functions (top panel) and filtered for 0.4-0.5 Hz (middle panel). The bottom panel is a histogram of the phase differences ( $\phi$ ) between the units' oscillations over the entire recording session. The units in each pair oscillated coherently with narrow distributions of phase differences, but only the units in Pair 2 oscillated nearly synchronously (i.e., with  $\sim 0$  degrees of phase difference). The mean  $\phi$  for each example pair is marked by the red

line on the polar plot. Note that the phase angle histograms and mean  $\phi$  illustrate the stable phase consistent relationships between pairs over the entire recording (often multiple hours), not only the 10 sec plotted in the above panels. At the population level of all 3164 pairs, the mean  $\phi$  across pairs are distributed uniformly across all phases. A pair was included in the population histogram if its distribution of phase relations was significantly non-uniform (Rayleigh's Test for Circular Uniformity,  $p < 0.05$ ), as in the 3 example pairs.

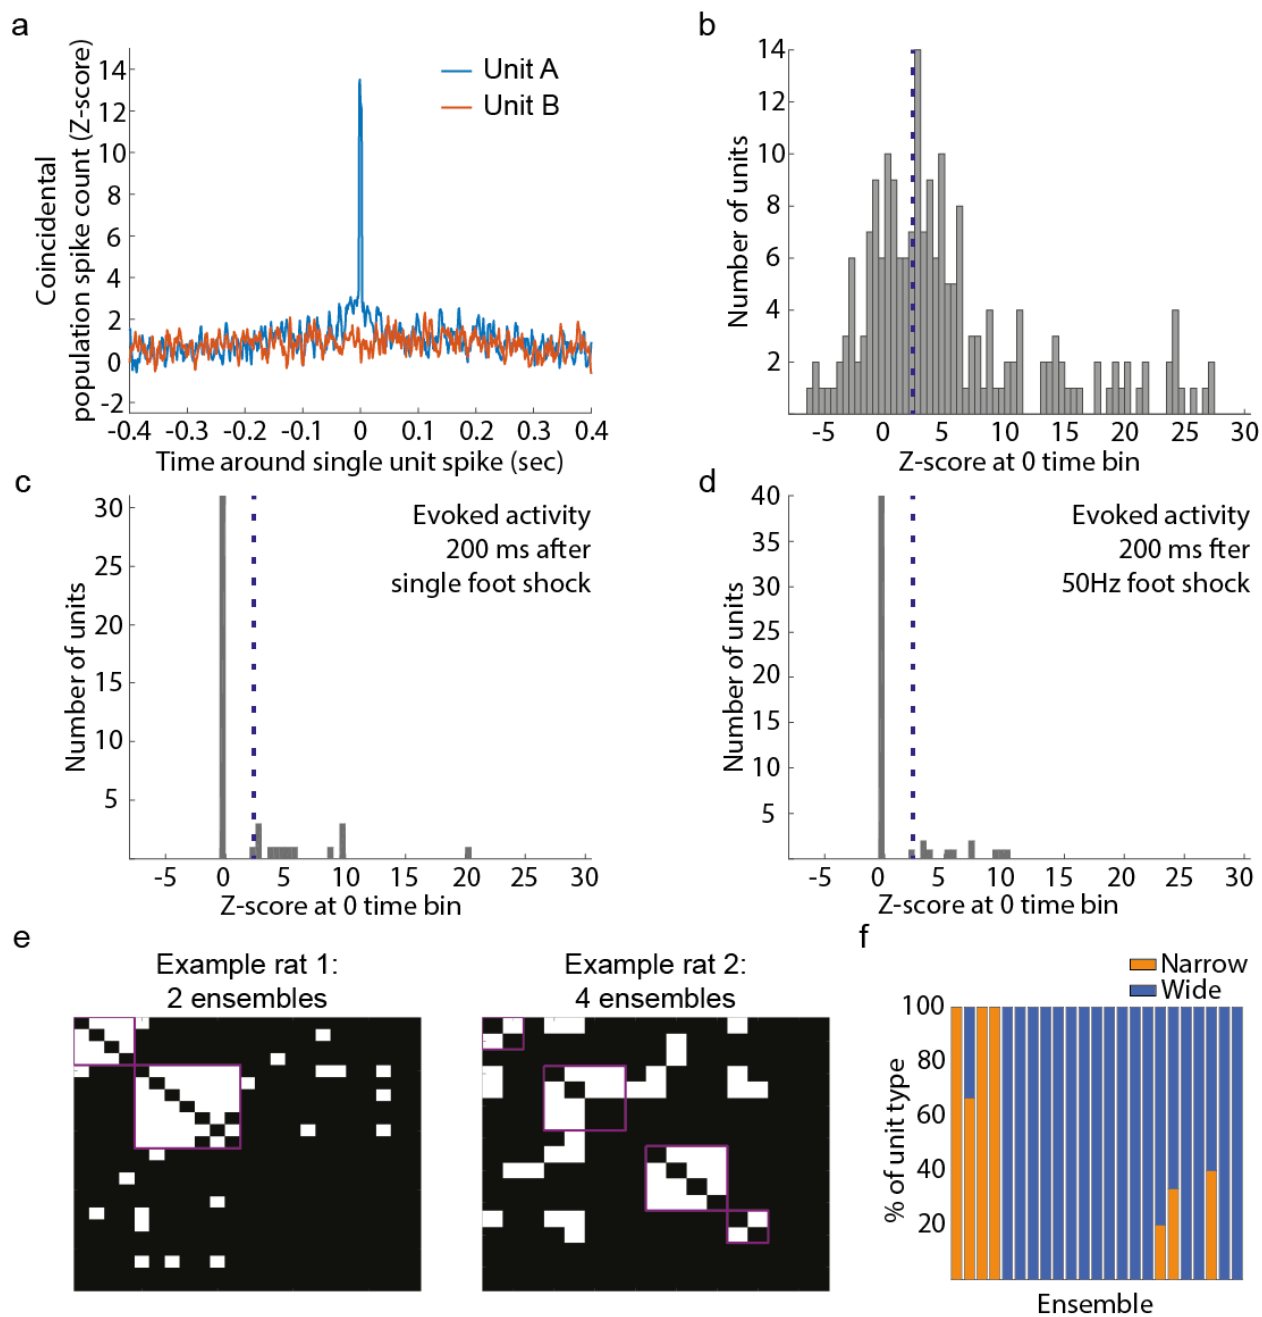

**Figure 6. LC single units have diverse coupling to the population and organize into ensembles of homogenous unit type. (A)** Population coupling was calculated as the cross-correlogram between each single unit and the merged spike train of all remaining single units that were simultaneously recorded. The cross-correlogram was calculated with 1 msec bins over a period of  $\pm 400$  msec and Z-score normalized to the period between 300 and 400 msec (edges of the cross-correlogram). Example unit A illustrates a case of strong population coupling.

Spikes of unit A coincided with spikes of many other units recorded simultaneously. Example unit B illustrates a lack of population coupling. **(B)** A histogram of the population coupling strength (Z-score at time 0) illustrates the broad range of population coupling strength across LC single units. Dotted lines show a Z-score of 2 for reference. **(C, D)** Population coupling using spikes during the 200 msec after a single foot shock (C) or after a brief train of foot shocks (5 mA pulses at 30 Hz) (D). As with spontaneous activity, many single units are not coupled to the population, with the exception of those units on the right tail of the distribution. **(E)** Two examples of ensembles detected in two rats. White dots indicate correlated units. Magenta lines outline ensembles. Ensembles are defined as correlated activity between two or more single units. All simultaneously recorded single units were treated as a network with links between correlated pairs and ensembles were detected using community detection algorithms on the network. **(F)** The percent of each unit type making up each ensemble. Each bar is one of 23 ensembles. The majority of units in each ensemble were the same type.

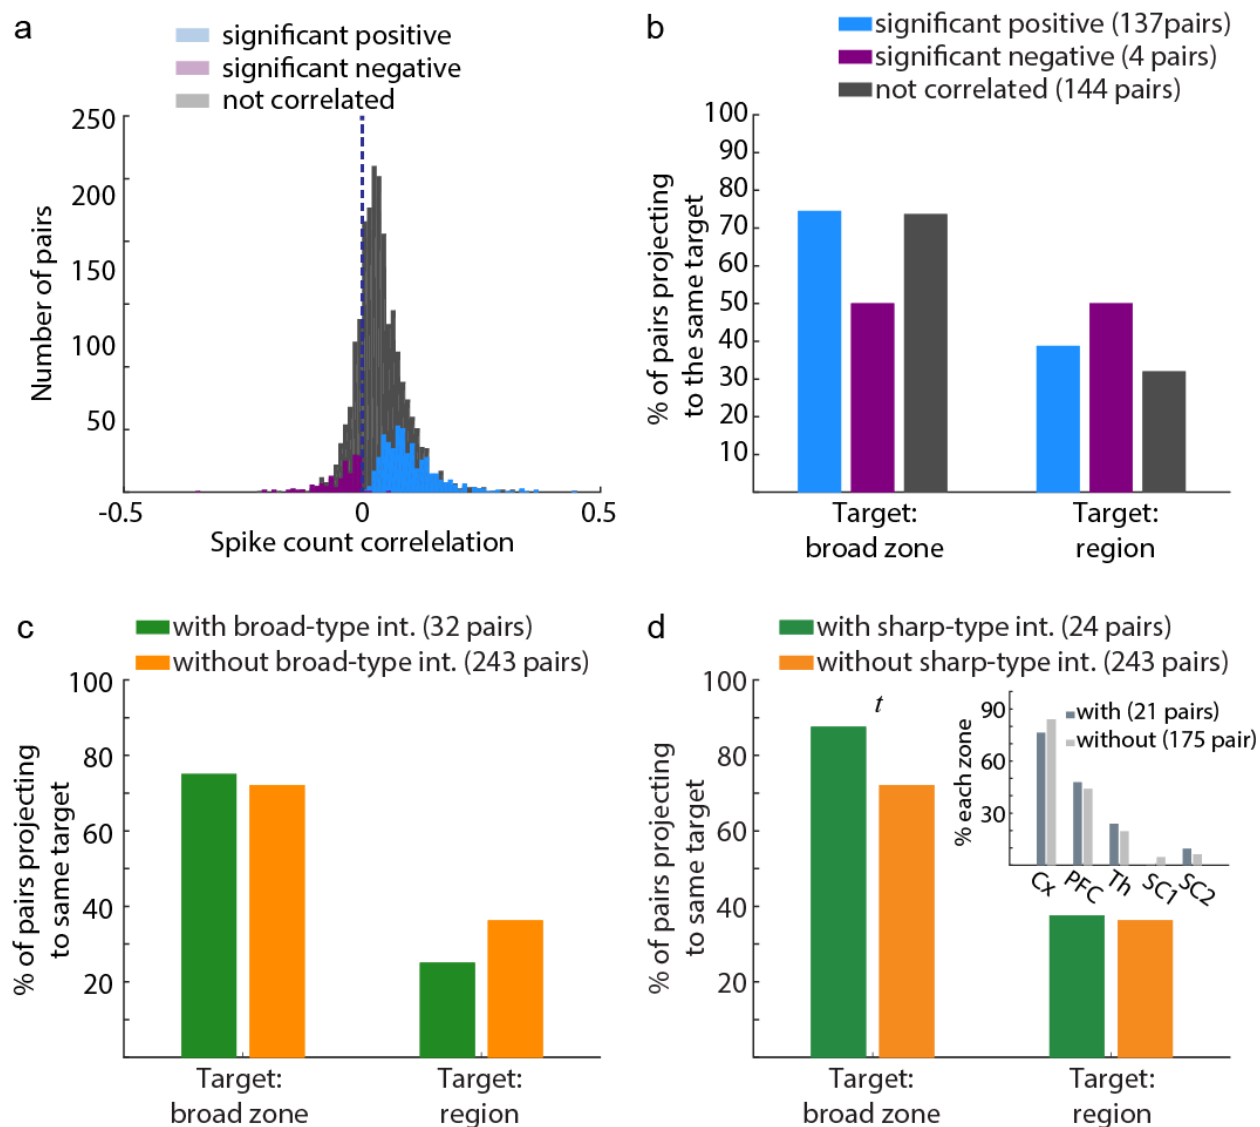

**Figure 7. The minority of unit pairs with synchrony on the timescale of gap junctions**

**provided targeted forebrain neuromodulation. (A)** Spike count correlations coefficients were divided into highly correlated pairs (Pearson's correlation coefficient,  $p < 0.001$ ) with positive (blue) or negative (purple) correlations. **(B)** The percent of pairs with both units jointly projecting to the same forebrain target did not differ between pairs with correlated activity (blue), anti-correlated activity (purple), and non-correlated units (grey). The percent is out of the total number of units indicated in the figure legend. Targets were defined as either individual brain regions or as zones (i.e., cortical, sub-cortical, thalamic, prefrontal, primary sensory cortex,

or secondary sensory cortex). Zones were examined because prior work has indicated that single LC neurons may project to multiple, functionally-related forebrain sites<sup>114</sup>. **(C)** The percent of pairs with overlapping projection targets did not depend on the pair having a network interaction. **(D)** Pairs with gap junction interactions had a significantly greater likelihood of projecting to the same forebrain target zone.

## Extended Data

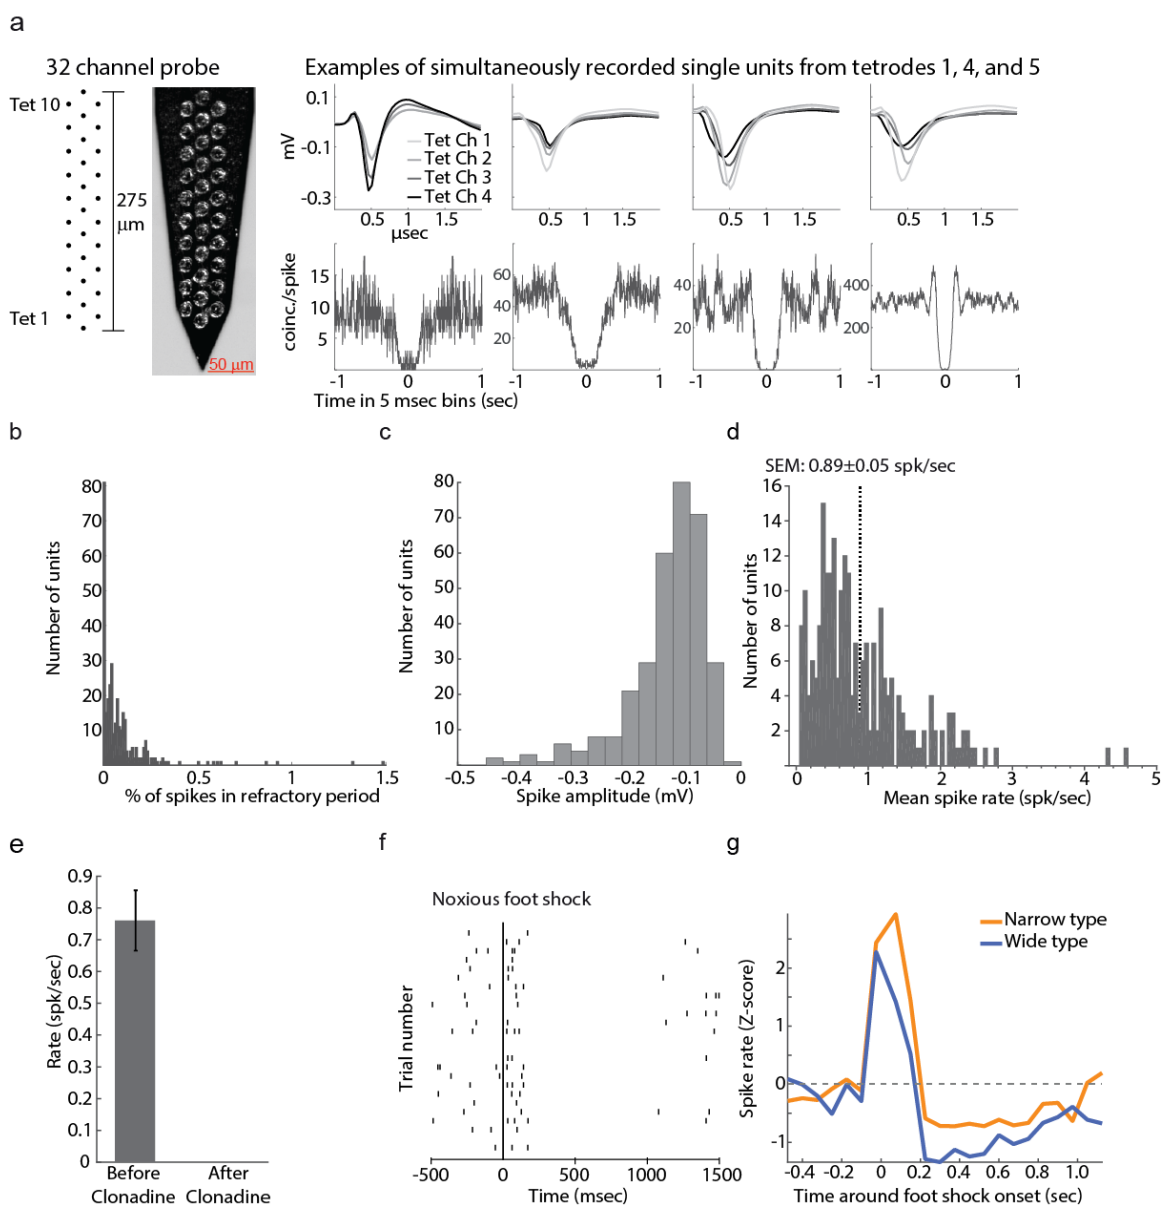

**Extended Data Figure 1. Characterization of single unit spontaneous activity, response to sensory stimuli, and clonidine.** A. Units were recorded using a silicone shank with 10 tetrodes. Each tetrode contained 4 channels with one channel overlapping with the adjacent channel. The probe was advanced until units on all channels were responsive to foot shock and inhibited by clonidine. The rightward panel shows the

average waveforms recorded on each tetrode channel for 4 units recorded on 3 different tetrodes. Below the waveforms, the auto-correlograms show a typical inter-spike interval of  $> 100$  msec. B. A histogram showing the distribution of refractory period violations (set at a conservative limit of 10 msec) across all units. Overall, the proportion of spikes during the refractory period was  $< 2\%$  with most neurons having fewer than 0.25% of their spikes during the refractory period. C. A distribution of single unit spike amplitudes taken from the tetrode channel with the maximal waveform. Spikes were, in general, of high amplitudes allowing reliable detection and sorting of spikes. D. The distribution of single unit firing rates shows that firing was typical of the LC with a mean of 0.89 spikes per sec. E. Units were inhibited by clonidine. The average firing rate before and after clonidine is plotted. F. An example raster showing the biphasic response to foot shocks (at  $t=0$  msec). Each row is a trial and the ticks represent spikes. G. The normalized mean response profile for narrow and wide units is plotted around foot shock onset at time 0. This plot illustrates the response to a burst of foot shocks (5mA pulses delivered at 30 Hz).



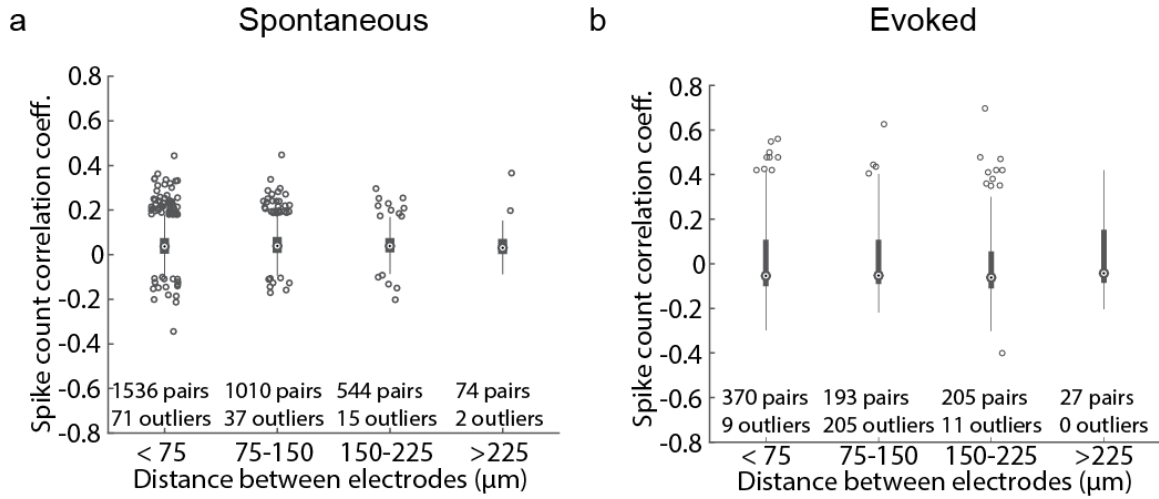

**Extended Data Figure 2. Spike count correlation coefficients did not depend on distance between unit pairs.** The distance between units was estimated as the distance between the electrode contacts that recorded the maximal amplitude of each unit. Data are plotted as box plots.

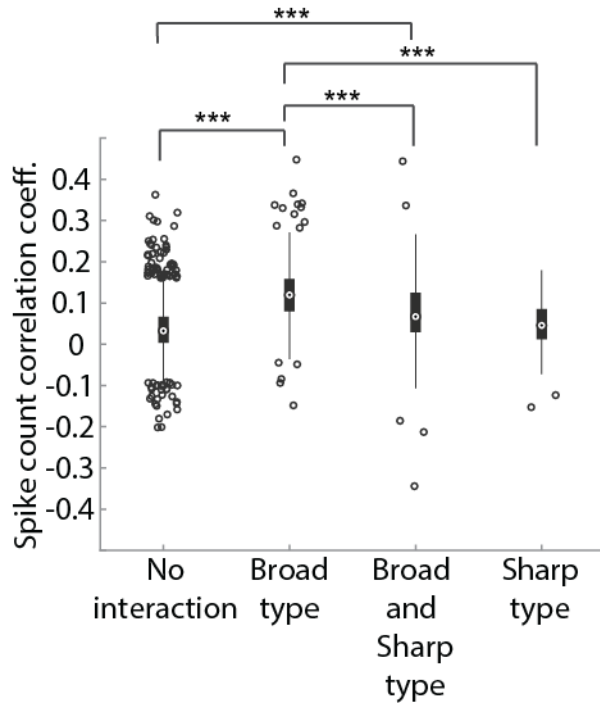

**Extended Data Figure 3. Pairs with network interactions have higher spike count correlations.**

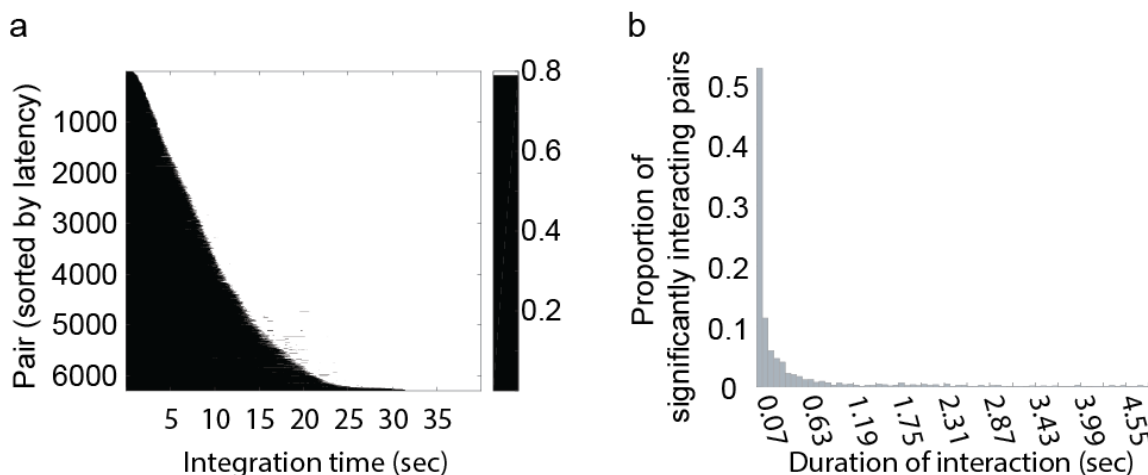

**Extended Data Figure 4. Synchrony in spike train cross-correlograms over the time**

**scale of seconds was extremely rare.** (A) The cumulative correlation coefficient was obtained at various tau by integrating over successively larger windows of the spike train cross-correlograms calculated over a  $\pm 40$  sec window in 5 msec bins. For each recorded pairwise cross-correlogram (considered in both directions) on the y-axis, the value of the cumulative correlation coefficient (black-white color) is plotted against tau (in seconds, x-axis). The tau at which the integration saturates is approximated at 0.8 (white). This point estimates when the majority of an interaction (a bump on a cross-correlogram) has ended and thus gives an overview of the timescale of interactions present in the data. This analysis indicated that interactions may occur up to 20 sec. (B) In order to test for interactions between 20 msec and 20 sec in duration, we calculated cross-correlograms and measured the duration of the interaction (excess coincidental spikes beyond the 1% pairwise global confidence interval derived from a surrogate sets of  $\pm 2$  sec jittered spike trains). The analysis revealed that the majority of significant interactions have a duration of under 1 sec with many lasting approximately 70 msec.

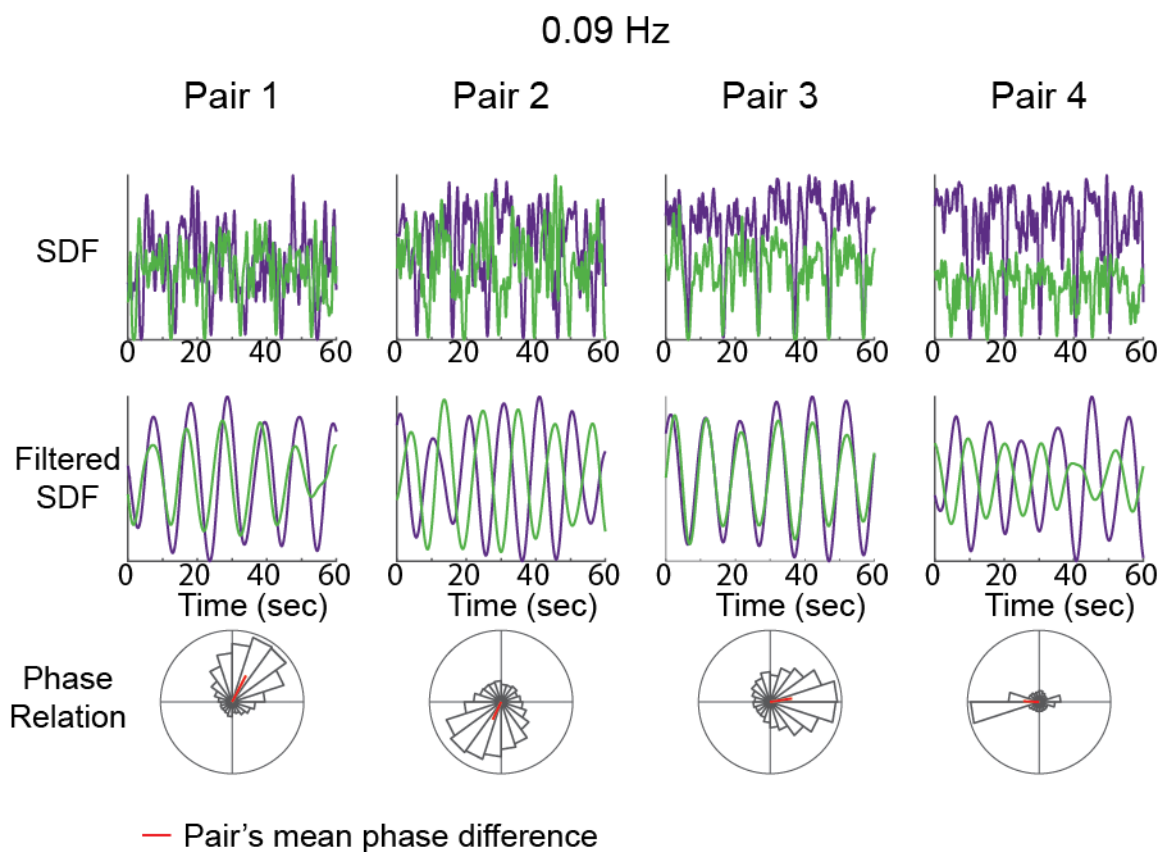

**Extended Data Figure 5. Examples of pairwise spike rate oscillations at 0.09 Hz.** The top and middle panels shows spike density functions over a small recording segment; the bottom panels show the phase relation between the units in the pair over the entire session. The mean phase relation for each pair is marked by the red line. All example pairs had a significantly non-uniform (Rayleigh's Test for Circular Uniformity,  $p < 0.05$ ).

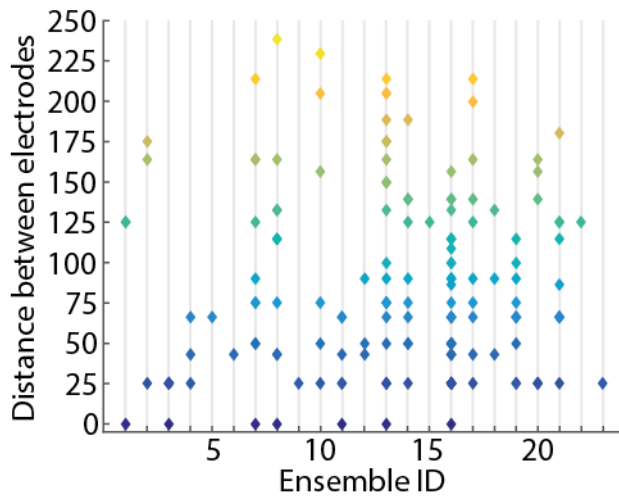

**Extended Data Figure 6. Ensembles are spatially diffuse.** The pairwise distance between all pairs within an ensemble are plotted for all 23 ensembles. The y-axis and the color indicate the distance between all unit pairs in each ensemble.

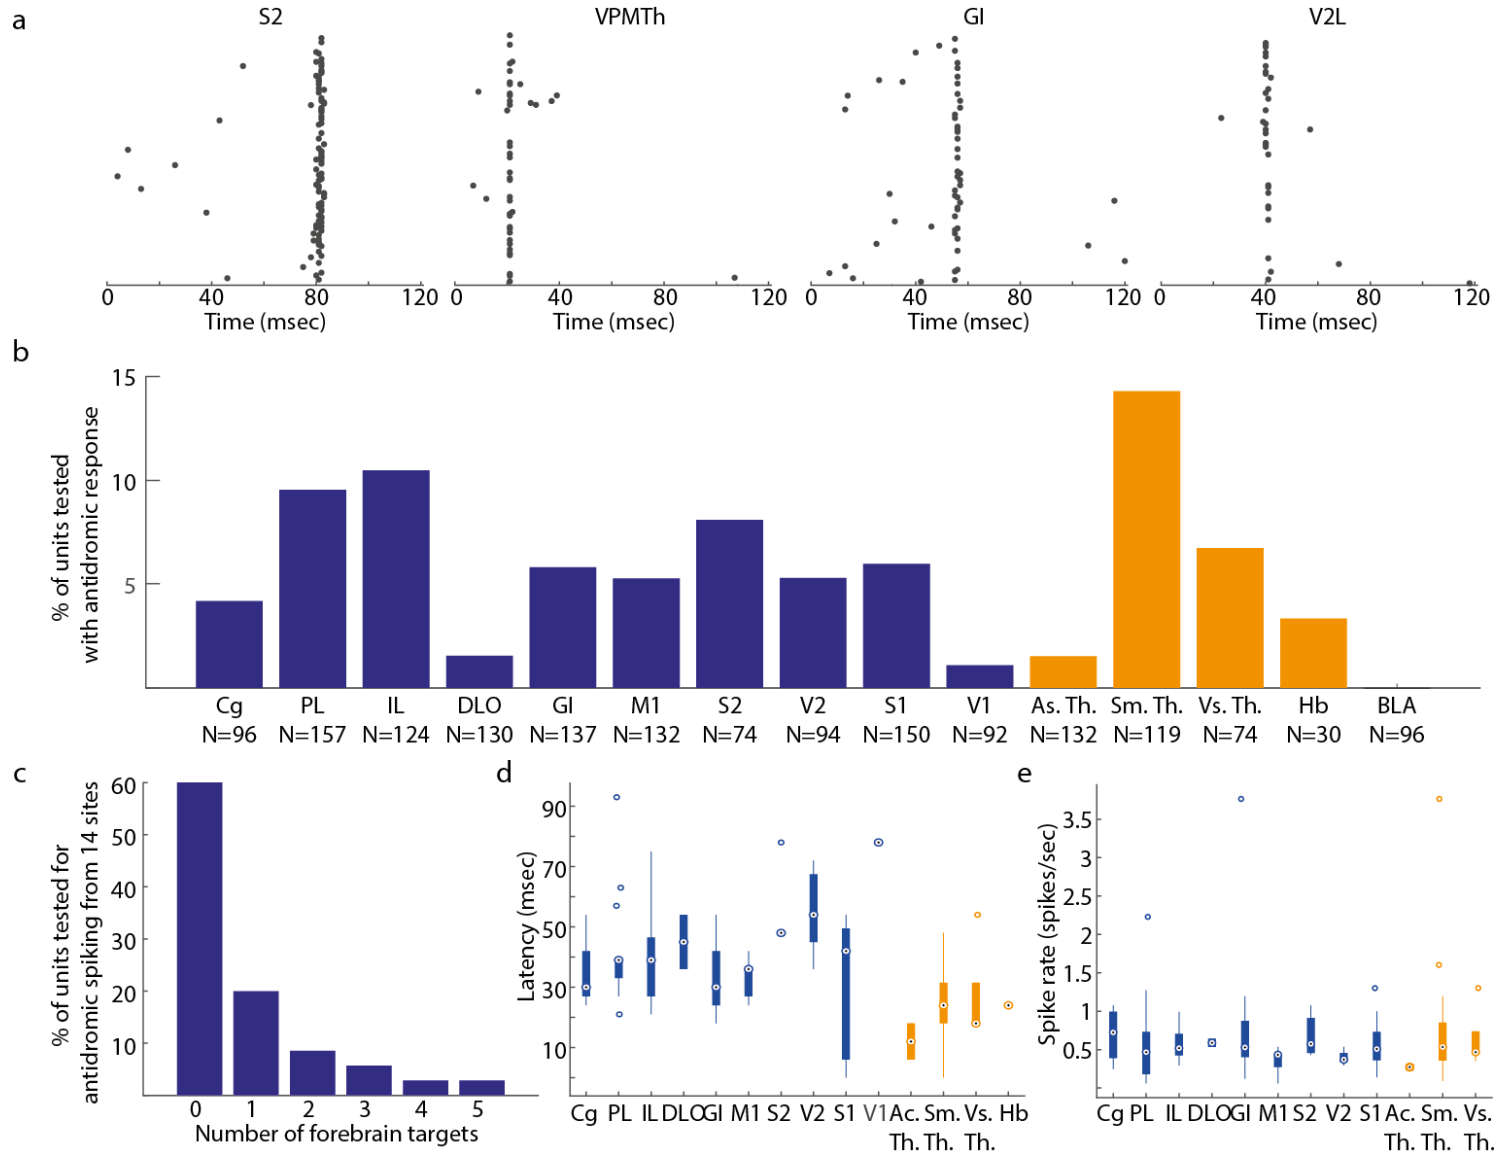

**Extended Data Figure 7. A summary of forebrain projection patterns and latencies.** (A) Examples spike rasters showing the timing of antidromically-driven spikes. The jitter of a few milliseconds and lack of consistent response on every trial is typical of unmyelinated LC axons <sup>112</sup>. (B) Single units projected to a variety of forebrain sites. The y-axis shows the percent of units projecting to each site. The total number of units tested for projections to each site is written on the x-axis. Cortical regions are in blue and sub-cortical regions are in orange. (C) A mixture of broad (multiple targets) and selective (single target out of 15 regions tested) projection patterns were observed. Antidromic activation of units after stimulation ranged from 1 to 5 forebrain sites. Selective projections are in agreement with prior anatomical studies that traced projections of single LC neurons <sup>29</sup>. The average number of projections per single unit with antidromic spiking was  $2.0 \pm 0.3$ , which is similar to the  $1.6 \pm 0.8$  projection targets reported using barcoded RNA <sup>29</sup>. (D) A box plot shows the latency of antidromic spikes elicited by stimulation of different forebrain sites. The latency of antidromic responses was shorter for sub-cortical stimulation sites compared to the cortical sites and latencies for more posterior cortices were longer in comparison to more anterior cortices. This is consistent with the LC projections, which pass through thalamus before entering anterior cortex and then traveling to the posterior cortex <sup>115</sup>. (E) The mean spike rate of LC single units did not depend on their projection target, although there was a tendency for PFC-projecting units to spike at a higher rate than M1-projecting units (M1 v.s. ACC:  $T(9) = -2.18$ ,  $p = 0.063$ ; M1 v.s. PL:  $T(20) = -1.07$ ,  $p = 0.296$ ; M1 v.s. IL:  $T(18) = -2.282$ ,  $p = 0.035$ ; M1 v.s. OFC:  $T(7) = -1.90$ ,  $p = 0.098$ ). This result is in agreement with a recent study using LC slice recordings from neurons labeled with retrograde tracers injected in the OFC, PL, ACC, and M1 <sup>30</sup>.

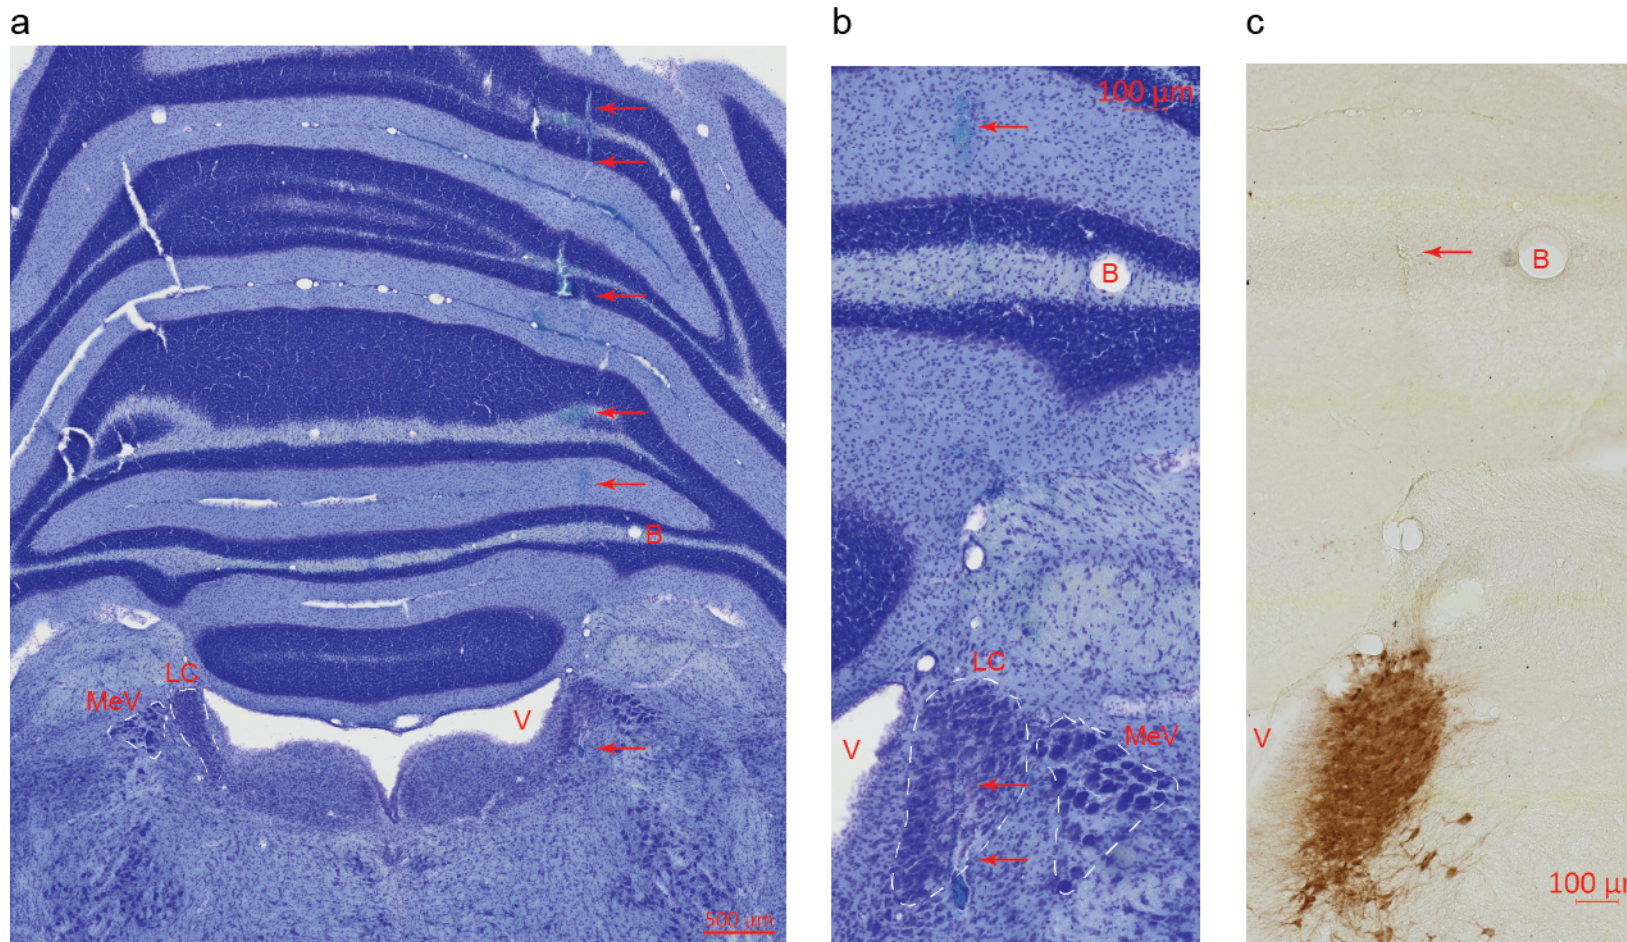

**Extended Data Figure 8. Histology illustrating an electrode track and the LC.** A. Nissl stain in a coronal section (50 μm thickness) shows the electrode track made by the 15 μm thick probe within the coronal plane (arrows). Although accurate



reconstruction of the electrode (15  $\mu\text{m}$  thickness in the coronal plane) oriented in 50  $\mu\text{m}$  thick coronal sections was difficult, the 15 degrees posterior angle of electrode insertion allowed visualization of the track dorsal to the LC traveling through the coronal plane. The dotted lines indicate the approximate extent of the LC and MeV (LC – Locus Coeruleus, MeV - Mesencephalic Nucleus of the Fifth Cranial Nerve, V – Fourth Ventricle). A blood vessel (B) is noticeable lateral to the electrode track and dorsal to the MeV. B. A close-up on the LC shown in A showing the LC and a track ventral to LC and medial to a blood vessel. C. The next section after the section in A and B that was stained with DAB against an antibody for the catecholamine-synthesis enzyme, Tyrosine Hydroxylase. Note the electrode track that is ventral to LC and medial to a blood vessel.

| <b>Region</b> | <b>Ref.</b> | <b>Anterior/Posterior</b> | <b>Lateral</b> | <b>Ventral from dura</b> | <b>Angle (deg)</b> |
|---------------|-------------|---------------------------|----------------|--------------------------|--------------------|
| LC            | Lambda      | -4.0 to -4.2              | 1.1 to 1.2     | 5.5 to 6.2               | 15 posterior       |
| PL            | Bregma      | +3.0                      | 0.6            | 3.0                      | none               |
| IL            | Bregma      | +3.0                      | 0.6            | 4.4                      | none               |
| ACC           | Bregma      | +1.0                      | 1.2            | 2.2                      | 4 lateral          |
| DLO           | Bregma      | +4.0                      | 3.0            | 2.4                      | none               |
| M1            | Bregma      | +3.0                      | 3.0            | 1.6                      | none               |
| GI            | Bregma      | +1.0                      | 5.0            | 4.0                      | none               |
| S1            | Bregma      | -1.0                      | 5.0            | 1.8                      | none               |
| S2            | Bregma      | -2.0                      | 4.5            | 4.15                     | 15 lateral         |
| BLA           | Bregma      | -1.88 to -2.12            | 4.6 to 4.9     | 6.8                      | none               |
| MDTh          | Bregma      | -3.0                      | 1.0            | 5.0                      | 2 lateral          |
| Hb            | Bregma      | -3.0                      | 1.0            | 4.5                      | 2 lateral          |
| VPMTh         | Bregma      | -3.0                      | 3.0            | 5.6                      | none               |
| DLGN          | Bregma      | -4.0                      | 3.5            | 4.0                      | none               |
| V2            | Bregma      | -5.0                      | 4.8            | 1.2                      | none               |
| V1            | Bregma      | -7.0                      | 3.0            | 1.4                      | none               |

**Extended Data Table 1. A list of the stereotactic coordinates for electrode placement. All coordinates are listed in millimeters.**
